## 1 **Two circadian oscillators in one cyanobacterium**

2 Christin Köbler<sup>a,1</sup>, Nicolas M. Schmelling<sup>b,1</sup>, Alice Pawlowski<sup>b,1</sup>, Philipp Spät<sup>c</sup>, Nina M.  
3 Scheurer<sup>a</sup>, Kim Sebastian<sup>a</sup>, Lutz C. Berwanger<sup>b</sup>, Boris Maček<sup>c</sup>, Anika Wiegard<sup>b</sup>, Ilka M.  
4 Axmann<sup>b,\*</sup>, Annegret Wilde<sup>a,\*</sup>

5 <sup>a</sup>Institute of Biology III, Faculty of Biology, University of Freiburg, 79104 Freiburg,  
6 Germany; <sup>b</sup>Institute for Synthetic Microbiology, Biology Department, Heinrich Heine  
7 University Düsseldorf, 40225 Düsseldorf, Germany; <sup>c</sup>Department of Quantitative  
8 Proteomics, Interfaculty Institute for Cell Biology, Eberhard Karls University Tübingen,  
9 72076 Tübingen, Germany

10 <sup>1</sup>C.K., N.M.S, and A.P. contributed equally to this study.

11 Corresponding authors:

12 \*Prof. Dr. Annegret Wilde, Albert-Ludwigs-Universität Freiburg, Institut für Biologie III,  
13 Schänzlestr. 1, 79104 Freiburg, Germany, Phone: +49 (0) 761-20397828

14 \*Prof. Dr. Ilka Axmann, Institute for Synthetic Microbiology, Biology Department, Heinrich  
15 Heine University Düsseldorf, 40225 Düsseldorf, Germany, Phone: +49 (0) 21181-10361

16 **Email:** [annegret.wilde@biologie.uni-freiburg.de](mailto:annegret.wilde@biologie.uni-freiburg.de); [Ilka.Axmann@hhu.de](mailto:Ilka.Axmann@hhu.de)

17 **Author Contributions:** C.K., I.M.A. and A.W. designed the study. C.K., N.M.S., A.P.,  
18 P.S., N.M.Sche., K.S., A. Wie, and L.B. performed and analyzed the experiments. All  
19 authors interpreted and discussed the data. C.K., N.M.S., A.P., P.S., B.M., A. Wie, I. M.A.,  
20 and A.W. wrote the paper.

21 **Competing Interest Statement:** The authors declare no conflict of interest.

22 **Keywords:** cyanobacteria, circadian clock, *Synechocystis* 6803, KaiA

23

## 24 **Abstract**

25 Organisms from all kingdoms of life have evolved diverse mechanisms to address the  
26 predictable environmental changes resulting from the Earth's rotation. The circadian clock  
27 of cyanobacteria is a particularly simple and elegant example of a biological timing  
28 mechanism for predicting daily changes in the light environment. The three proteins KaiA,  
29 KaiB, and KaiC constitute the central timing mechanism that drives circadian oscillations  
30 in the cyanobacterium *Synechococcus elongatus* PCC 7942. In addition to the standard  
31 oscillator, *Synechocystis* sp. PCC 6803, another model organism for cyanobacterial  
32 research, harbors several divergent clock homologs. Here, we describe a potential new  
33 chimeric KaiA homolog that we named KaiA3. At the N-terminus, KaiA3 is similar to the  
34 NarL-type response regulator receiver domain. However, its similarity to canonical NarL  
35 transcription factors drastically decreases in the C-terminal domain, which resembles the  
36 circadian clock protein, KaiA. In line with this, we detected KaiA3-mediated stimulation of  
37 KaiC3 phosphorylation. Phosphorylation of KaiC3 was rhythmic over 48 h in vitro in the  
38 presence of KaiA3 and KaiB3 as well as in *Synechocystis* cells under free-running  
39 conditions after light/dark entrainment. This results in the presence of two different  
40 oscillators in a single-celled prokaryotic organism. Deletion of the *kaiA3* gene leads to  
41 KaiC3 dephosphorylation and results in growth defects during mixotrophic growth and in  
42 the dark. In summary, we suggest that KaiA3 is a nonstandard KaiA homolog, thereby  
43 extending the KaiB3-KaiC3 system in Cyanobacteria and potentially other prokaryotes.

44

## 45 **Introduction**

46

47 The three genes, *kaiA*, *kaiB*, and *kaiC*, encode the core circadian oscillator in  
48 Cyanobacteria<sup>1</sup>. Over the last few decades, the biochemical interplay between these three  
49 proteins has been studied in great detail in *Synechococcus elongatus* PCC 7942  
50 (hereafter *Synechococcus*). The KaiC protein forms a homohexamer and has autokinase,  
51 autophosphatase, and ATPase activities<sup>1, 2, 3, 4</sup>. By associating with KaiC, KaiA stimulates  
52 the autokinase and ATPase activities of KaiC, and thus, the protein gets phosphorylated<sup>5</sup>  
53 <sup>6, 7</sup>. Upon phosphorylation of two neighboring residues (Ser431 and Thr432), KaiC  
54 undergoes structural rearrangements, exposing a binding site for KaiB<sup>8, 9, 10</sup>. After binding,  
55 KaiB sequesters KaiA from KaiC, promoting KaiC's autophosphatase activity, and the  
56 protein reverts back to its unphosphorylated state<sup>8, 9, 11</sup>. The interplay between KaiA and  
57 KaiB is crucial for the KaiC phosphorylation cycle, which confers clock phase and  
58 rhythmicity to the cell<sup>12, 13</sup>. For a more detailed review on the KaiABC oscillator and its  
59 regulatory network, see Cohen and Golden<sup>14</sup>, Swan *et al.*<sup>15</sup> and Snijder and Axmann<sup>16</sup>.

60

61 Although most studies on prokaryotic circadian rhythms have focused on the  
62 cyanobacterium *Synechococcus*, it has been shown that the standard KaiABC system is  
63 functionally conserved in other cyanobacteria<sup>17</sup>. However, in addition to the standard  
64 KaiABC system, divergent homologs of KaiB and KaiC have been identified in  
65 cyanobacteria, other bacterial species, and archaea<sup>18</sup>. The structure, mechanism of

66 function, and physiological roles of these homologs are often unclear. A few studies have  
67 demonstrated the role of KaiB and KaiC homologs in stress responses in e.g. *Legionella*  
68 *pneumophila*<sup>19</sup> and *Pseudomonas* species<sup>20</sup>. However, other Kai homologs are involved  
69 in the regulation of diurnal rhythms outside the cyanobacterial lineage. These include e.g.  
70 KaiB and KaiC homologs from the phototrophic bacterium *Rhodospseudomonas*  
71 *palustris*<sup>21</sup>. Recently, a KaiA-independent hourglass timer was reconstituted using  
72 *Rhodobacter sphaeroides* KaiC and KaiB homologs. *R. sphaeroides* KaiC exhibits a  
73 divergent extended C-terminus which is typically found in proteins belonging to the KaiC2  
74 subgroup<sup>22</sup>. This C-terminal extension interacts with the protein, allowing for KaiA-  
75 independent phosphorylation. *R. sphaeroides* KaiB controls the phosphorylation-  
76 dephosphorylation cycle of KaiC depending on the ATP-to-ADP ratio, suggesting that  
77 metabolic changes during the day and night cycles drive this KaiBC clock<sup>22</sup>.  
78 The cyanobacterium *Synechocystis* sp. PCC 6803 (hereafter *Synechocystis*) is a  
79 facultative heterotrophic cyanobacterium that, in contrast to *Synechococcus*, can utilize  
80 glucose as an energy and carbon source. *Synechocystis* encodes, in addition to the  
81 canonical *kaiAB1C1* gene cluster, two further *kaiB* homologs, named *kaiB2* and *kaiB3*,  
82 and two *kaiC* homologs, named *kaiC2*, and *kaiC3*<sup>23</sup>. For the *Synechocystis* KaiB3-KaiC3  
83 timing system, Aoki and Onai suggested a function in the fine-tuning of the core oscillator  
84 KaiAB1C1 by modulating its amplitude and period<sup>24</sup>. This idea was supported by Wiegard  
85 *et al.*, who investigated the characteristics of the KaiC3 protein and proposed an interplay  
86 between the KaiB3-KaiC3 system and the proteins of the standard clock system<sup>25</sup>.  
87 Furthermore, autophosphorylation and ATPase activities of *Synechocystis* KaiC3 have  
88 been verified, suggesting that enzymatic activities might be conserved across the KaiC  
89 protein family<sup>25, 26, 27</sup>. However, compared to *Synechococcus* KaiC, KaiC3 ATPase activity  
90 was reduced and lacked temperature compensation, an essential feature of true circadian  
91 oscillations<sup>4, 25</sup>. Recently, Zhao *et al.*<sup>17</sup> used a luminescence gene reporter to study  
92 circadian gene expression in the *Synechocystis* wild type in comparison to mutant strains  
93 lacking each of the *kai* genes. They demonstrated that the *kaiAB1C1* and *kaiB3C3* genes  
94 are both important for circadian rhythms in *Synechocystis*, whereas *kaiC2* and *kaiB2*  
95 deletion mutants still showed rhythmic gene expression, which is in agreement with  
96 previous suggestions by Aoki and Onai<sup>24</sup>. Phenotypic mutant analysis by our group  
97 revealed that two systems function in the autotrophy/heterotrophy switch, especially  
98 affecting heterotrophic growth. In contrast to the study by Zhao *et al.*<sup>17</sup>, the deletion of  
99 *kaiC3* in the motile *Synechocystis* strain (PCC-M in<sup>28</sup>) used in our study had no effect on  
100 growth under light/dark cycles. However, the mutant strain displayed a growth defect  
101 under chemoheterotrophic conditions in the dark compared to the wild type<sup>25, 29</sup>. This  
102 impairment was less severe in comparison with the  $\Delta$ *kaiAB1C1*-deficient strain, which  
103 completely lost its ability to grow in the dark. Notably, complete deletion of *kaiC2* was not  
104 possible in the wild-type strain used in our laboratory. Although Zhao *et al.*<sup>17</sup> clearly  
105 showed that deletion of the *kaiC3* and *kaiB3* genes affects the circadian rhythm of  
106 *Synechocystis*, it remains unclear whether the KaiB3-KaiC3 system can function as an  
107 oscillator. How can such a minimal system maintain circadian rhythmicity without KaiA?  
108 *Prochlorococcus* MED4, which lacks a *kaiA* gene in the entire genome, is suggested to

109 have no true circadian rhythmicity<sup>30,31</sup>. Moreover, *Synechocystis* KaiC3 lacks the extended  
110 C-terminus, which is crucial for the oscillation of the *R. sphaeroides* KaiBC hourglass  
111 timer<sup>22</sup>.

112 In *Synechococcus*, the KaiA protein functions as a homodimer and harbors two distinct  
113 domains connected by a linker sequence<sup>32, 33, 34</sup>. The N-terminal domain is similar to  
114 bacterial response regulators but lacks the aspartate residue crucial for phosphorylation;  
115 hence, it is designated as a pseudoreceiver domain (PsR domain)<sup>32</sup>. This domain was  
116 shown to bind the oxidized form of quinones and is therefore able to directly sense the  
117 onset of darkness and forward signals to the C-terminal domain<sup>32, 35</sup>. The C-terminus has  
118 a four-helix bundle secondary structure and is highly conserved within Cyanobacteria. The  
119 domain harbors the KaiA dimer interface and the KaiC binding site, and is necessary to  
120 stimulate the autophosphorylation activity of KaiC<sup>32, 34</sup>. Mutations in *kaiA*, resulting in  
121 altered periodicity, were mapped throughout both domains, indicating their importance for  
122 rhythmicity<sup>34, 36</sup>.

123 To date, the regulatory network of the KaiB3-KaiC3 system in *Synechocystis* has remained  
124 enigmatic, as it does not interact with KaiA and does not utilize the SasA-RpaA output  
125 pathway, suggesting alternative yet unidentified components for KaiB3-KaiC3-based  
126 signal transduction<sup>37</sup>. In a large-scale protein-protein interaction screen, a potential  
127 interaction partner of KaiC3 was identified<sup>38</sup>. This protein, SII0485, was categorized as a  
128 NarL-type response regulator and could be a potential element in the KaiB3-KaiC3  
129 signaling pathway<sup>39</sup>.

130 In this study, we computationally characterized SII0485 and detected strong co-  
131 occurrences of the KaiB3-KaiC3 system with SII0485 in the genomic context of  
132 Cyanobacteria and other bacteria. Bioinformatics analysis highlighted a resemblance  
133 between the N-terminal domain of the protein and the receiver domain of NarL-type  
134 response regulators, yet the C-terminal domain shared similarities with KaiA homologs.  
135 Therefore, we investigated the effects of SII0485 on KaiC3 phosphorylation. SII0485  
136 increased the phosphorylation of KaiC3 *in vitro* and *in vivo*. We observed SII0485-  
137 dependent 24-hour oscillations of KaiC3 phosphorylation in *Synechocystis* cells grown  
138 under light/dark and continuous light conditions. Those 24h oscillations of KaiC3  
139 phosphorylation could be reconstituted *in vitro* by incubation with SII0485 and KaiB3.  
140 Deletion of *sII0485* led to impaired viability during mixotrophic and heterotrophic growth,  
141 in line with previous studies on the KaiB3-KaiC3 system<sup>25</sup>. Thus, we propose that SII0485  
142 is a novel KaiA-like homolog linked to the KaiB3-KaiC3 system which together with the  
143 standard KaiA1B1C1 system controls circadian rhythms and the phototrophy-to-  
144 heterotrophy switch in *Synechocystis*.

145

## 146 **Results**

147

148 *KaiA3* is a chimeric protein harboring a NarL-type response regulator domain at the N-  
149 terminus and a conserved KaiA-like motif at the C-terminus

150

151 The canonical clock genes, *kaiABC* and *kaiA1B1C1*, form a cluster in *Synechococcus* and  
152 *Synechocystis*, respectively. In contrast, the *kaiB3* and *kaiC3* genes of *Synechocystis* are  
153 localized in different regions of the chromosome (Fig. S1A). Here, the *kaiB3* gene forms a  
154 transcriptional unit with the upstream open reading frame *slI0485*. SlI0485 has been  
155 annotated as a NarL-type response regulator<sup>39</sup>. Using reciprocal BLAST analyses, we  
156 detected orthologs of SlI0485 in 15 cyanobacterial species (16.5% of cyanobacterial  
157 species contained at least one KaiC homolog), mainly belonging to the order  
158 *Chroococcales*<sup>40</sup> (Data S1), and in five bacterial genera outside of Cyanobacteria, namely  
159 *Roseiflexus*, *Chloroflexus*, *Chloroherpeton*, *Rhodospirillum*, and *Bradyrhizobium*.  
160 Owing to the genetic context, we aligned the cyanobacterial SlI0485 orthologs with both,  
161 a NarL-type response regulator (Fig. S2) and cyanobacterial KaiA proteins (Fig. 1A). The  
162 canonical NarL protein consists of an N-terminal receiver domain, a linker, and a C-  
163 terminal DNA-binding domain with a helix-turn-helix motif<sup>39, 41</sup>. The N-terminus of the  
164 SlI0485 orthologs is conserved and indeed shows limited homology to NarL-type response  
165 regulators (Fig. S2). However, the similarities to the NarL protein decreased in the C-  
166 terminus (Fig. S2). Concurrently, conservation between SlI0485 and the KaiA protein  
167 family increased (Fig. 1A). The conserved residues in the C-terminus correspond to  
168 structurally important features of the *Synechococcus* KaiA protein, such as  $\alpha$ -helical  
169 secondary structures, the KaiA dimer interface, or residues critical for the KaiA-KaiC  
170 interaction<sup>32, 33</sup> (Fig. 1A). Additionally, the lack of conservation in the N-terminus  
171 compared to that observed in known KaiA orthologs is consistent with the results of  
172 Dvornyk and Mei, who proposed that different N-terminal domains exist for KaiA homologs  
173 for functional diversification<sup>42</sup>. Because of its similarity to KaiA and synteny with the *kaiB3*  
174 gene, we named the hypothetical SlI0485 protein KaiA3. Furthermore, to facilitate the  
175 distinction of KaiA homologs, we will use the name KaiA1 for the *Synechocystis* KaiA core  
176 clock homolog Slr0756.  
177 The gene tree resulting from the multiple sequence alignment (Fig. 1A) distinctly separated  
178 KaiA3 from canonical KaiA orthologs. To further investigate the evolutionary relationship  
179 of KaiA3, multiple sequence alignments of the C-termini of orthologs of KaiA3, KaiA, and  
180 Slr1783 (Rre1) as a reference for NarL orthologs in Cyanobacteria<sup>43</sup> were used to  
181 construct a phylogenetic tree (Fig. S3). Here, KaiA3 orthologs form a distinct clade at the  
182 basis of the KaiA orthologs when compared to both orthologous groups of Slr1783  
183 (Rre1)/NarL (*E. coli*, UniProtKB - P0AF28) and KaiA simultaneously (Fig. S3). In summary,  
184 these findings strengthen the idea that the C-terminus of KaiA3 functions similarly to that  
185 of KaiA.



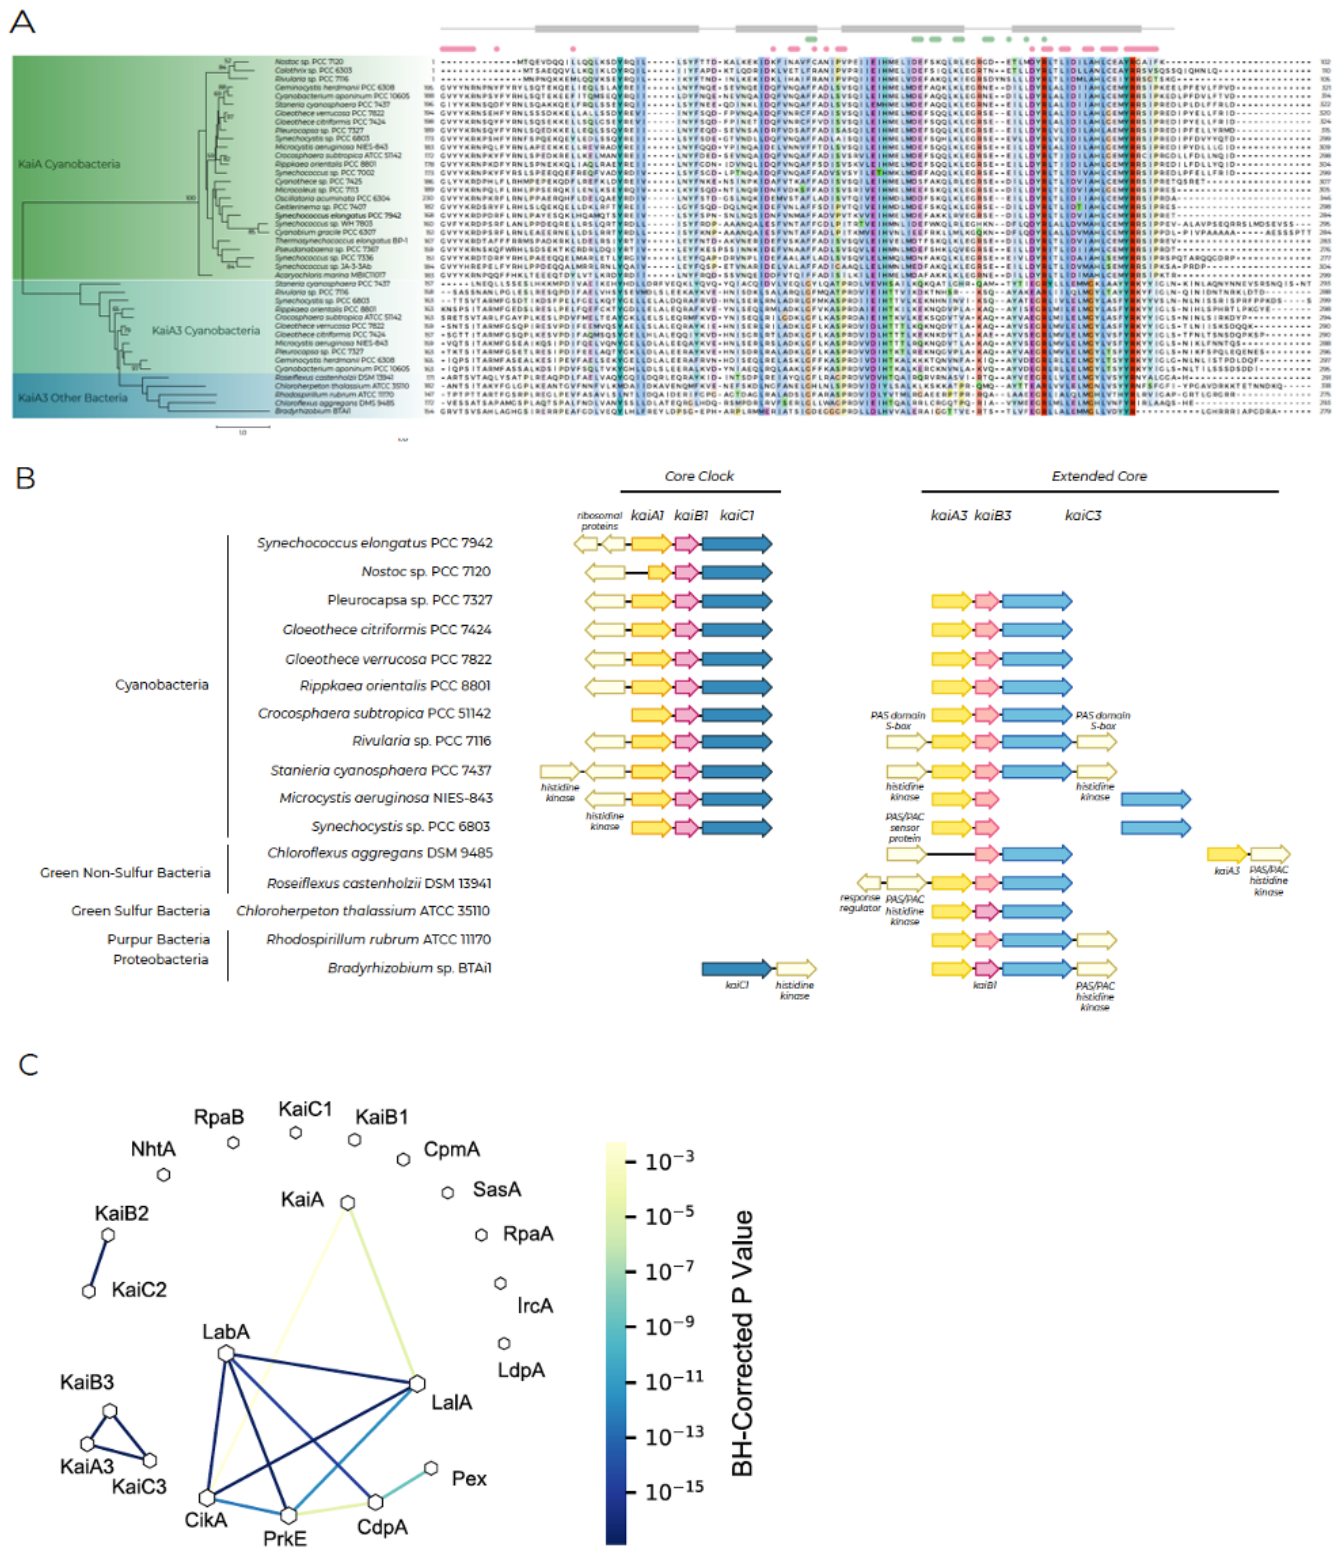

187 **Fig. 1.** Bioinformatic analyses of Sll0485 (KaiA3). (A) Multiple sequence alignment and maximum  
188 likelihood-inferred phylogenetic reconstruction of KaiA3 and selected KaiA orthologs. The  
189 sequences were aligned with Mafft (L-INS-i default parameters, Jalview), trimmed to position 168  
190 of the C-terminus of *Synechococcus* KaiA and are represented in the Clustalx color code with  
191 conservation visibility set to 25%. Marks above the alignment refer to *Synechococcus* KaiA as a  
192 reference. Light green bars and dots indicate residues critical for KaiC interaction, light pink bars  
193 and dots represent residues important for dimerization, and light gray blocks outline residues  
194 forming  $\alpha$ -helices as secondary structures. Aligned sequences were used to infer a maximum  
195 likelihood protein tree. The scale bar indicates one substitution per position. Bootstrap values  
196 ( $n=1000$ ) are displayed on the branches. Bootstrap values less than 50 are not shown. (B) Synteny  
197 analysis of *kaiA1B1C1* compared to *kaiA3*, *kaiB3*, and *kaiC3* genes for selected bacterial species.  
198 Analysis was performed with the online tool SyntTax, a prokaryotic synteny and taxonomy explorer  
199 (<https://archaea.i2bc.paris-saclay.fr/synttax/>; 2020-06-08). Default settings were used for analysis  
200 (best match, 10% norm. Blast). (C) Co-occurrence of KaiA3 using pairwise Fisher's exact test with  
201 circadian clock proteins in Cyanobacteria. Network of significant co-occurring circadian clock  
202 factors from Schmelling *et al.*<sup>26</sup>, including KaiA3 in Cyanobacteria. The line color corresponds to  
203 the level of significance resulting from pairwise Fisher's exact test. Missing links were those with a  
204 p-value higher than 0.01. The node size is proportional to the degree of that node.  
205

206 We further constructed three-dimensional models of KaiA3 to gain a better understanding  
207 of its potential functions. To date, no structure is available for KaiA3, and it is impossible  
208 to generate a reliable three-dimensional model covering the full-length KaiA3 sequence  
209 because of the enigmatic structure of the linker region, for which no significant similarities  
210 could be detected. However, secondary structure prediction suggested that the N-  
211 terminus structurally aligns with NarL (Fig. S4A). Therefore, we modeled the N-terminus  
212 (residues 1-140) and the remaining part of the sequence separately (residues 141-299).  
213 For the N-terminus, numerous hits for response regulator domains were obtained, with *E.*  
214 *coli* NarL (PDB 1A04) showing the highest degree of sequence similarity. The 3D-model  
215 structures of KaiA3 are highly similar and display the canonical fold of response regulator  
216 domains: a central five-stranded parallel  $\beta$ -sheet flanked on both faces by five amphipathic  
217  $\alpha$ -helices and a phosphorylatable aspartate residue in the  $\beta$ 3-strand (Fig. S4B). This  
218 aspartate residue (D65) plays a role in response regulator phosphorylation (Fig. S2, blue  
219 stars) and is conserved in all species, except *Pleurocapsa* and *Microcystis*. Thus, most  
220 KaiA3 homologs, including the *Synechocystis* protein, harbor a potential phosphorylation  
221 site. Furthermore, the structure superimposes well on the PsR domain of KaiA, even  
222 though the PsR domain lacks the phosphate-accepting aspartate residue and the  $\alpha$ 4-helix  
223 between the  $\beta$ 4- and  $\beta$ 5-strands (Fig. S4B). The amino acid sequence between the  
224  $\beta$ 4- and  $\beta$ 5-strands shows the least conservation between KaiA and KaiA3, yet the level  
225 of sequence conservation in this region is generally low for KaiA and its homologs<sup>34</sup>. In  
226 contrast to the N-terminal response regulator domain, the C-terminal domain of KaiA3  
227 revealed a unique fold, which has only been detected in KaiA thus far<sup>44</sup>, and the N-terminal  
228 domain of the phosphoserine phosphatase RsbU from *Bacillus subtilis*<sup>45</sup>, namely, a unique  
229 four  $\alpha$ -helix bundle constituting the KaiA-like motif (Fig. S4C). In conclusion, we propose  
230 that KaiA3 consists of two protein modules: i) the N-terminal domain, resembling a NarL-  
231 type response regulator receiver domain, including its phosphorylation site, and ii) the C-  
232 terminal domain displaying features of a KaiA-like motif. This is particularly intriguing

233 because putative *kaiA* orthologs outside Cyanobacteria have not been identified until  
234 recently<sup>42</sup>.

235

236 *Conserved synteny and co-occurrence of KaiA3 and the KaiB3-KaiC3 system among*  
237 *prokaryotes*

238

239 As in *Synechocystis*, we found the *kaiA3* gene upstream of *kaiB3* in all the analyzed  
240 cyanobacterial genomes. Furthermore, the *kaiA3B3* cluster is usually extended by *kaiC3*,  
241 with only two exceptions (*Synechocystis* and *Microcystis aeruginosa* NIES-843), which  
242 resemble the structure of the canonical *kaiABC* gene cluster (Fig. 1B). Interestingly,  
243 *kaiA3B3C3* synteny was also found in other prokaryotic genomes that harbor orthologs of  
244 *kaiA3*, except for *Chloroflexus aggregans* DMS 9485 (Fig. 1B). Furthermore, we detected  
245 strong significant co-occurrences between KaiA3 and KaiB3 ( $p < 0.0001$ ) as well as  
246 between KaiA3 and KaiC3 ( $p < 0.0001$ ; Fig. 1C) in organisms encoding KaiC1. The co-  
247 occurrence of KaiB3 and KaiC3 has been previously shown<sup>26</sup>. Thus, KaiA3 forms a distinct  
248 set of proteins with KaiB3 and KaiC3, which show no further significant co-occurrence with  
249 other clock components (Fig. 1C,<sup>26</sup>). Altogether, both datasets suggest a functional  
250 relationship between KaiA3 and the KaiB3-KaiC3 system.

251

252 *KaiA3 interacts with and promotes autokinase activity of KaiC3*

253

254 Using yeast two-hybrid (YTH) experiments, we verified the interaction between the clock  
255 proteins KaiC3 and KaiA3 (Fig. 2A, Fig. S5), consistent with a previous large-scale protein-  
256 protein interaction analysis by Sato *et al.*<sup>38</sup>. Although KaiA3 clearly interacted with KaiC3,  
257 an interaction with KaiB3, the second element of the KaiB3-KaiC3 clock system, was not  
258 detected (Fig. S5B). This is not surprising, as it has been demonstrated that the interaction  
259 of the *Synechococcus* proteins KaiA and KaiB requires the presence of KaiC<sup>46</sup>. To further  
260 characterize the interaction of the proteins *in vitro*, we heterologously expressed different  
261 Kai proteins in *E. coli* and analyzed complex formation using clear-native PAGE (Fig. 2B  
262 and Fig. S6). The His-tagged KaiA3 protein (monomer: 35 kDa) migrated as a single band  
263 approximately 100 kDa in size, indicating the formation of KaiA3 homo-oligomers, at least  
264 dimers. *Synechococcus* KaiA migrated at ~60 kDa, in line with previous results<sup>47</sup>,  
265 confirming the formation of KaiA dimers. The discrepancy in the migration pattern between  
266 KaiA3 (His-tagged) and KaiA (GST-tag removed) might be due to differences in their  
267 predicted charge (-19.17 for KaiA and -7.94 for KaiA3, respectively, at pH 7.0).  
268 Recombinant KaiB3 (monomer: 12 kDa) was shown to form monomers and tetramers  
269 after size exclusion chromatography<sup>25</sup>. KaiB3 displayed three distinct bands in the native  
270 gels (Fig. 2B). The two lower bands most likely represent the monomeric and tetrameric  
271 forms, whereas the uppermost band (~67 kDa) could be an impurity in the protein  
272 preparation. Recombinant KaiC3 was produced with an N-terminal Strep-tag<sup>25</sup>. Strep-  
273 tagged KaiC3 (monomer: 58 kDa) migrated as one band between 272 and 450 kDa and  
274 could represent a hexameric complex (348 kDa). Incubation of KaiC3 with KaiA3 alone  
275 led to protein accumulation in the wells in native PAGE, indicating precipitation of the



276 KaiA3/KaiC3 complex in the absence of KaiB3 (Fig. 2B). However, the interaction between  
277 KaiA3 and KaiC3 was validated by immunoprecipitation-coupled liquid chromatography-  
278 mass spectrometry (LC-MS) analysis of FLAG-tagged KaiC3 (Fig. S7). Furthermore, the  
279 experiments did not reveal any interactions between KaiA3 and either KaiC1 or KaiC2  
280 (Fig. S5, Fig. S7), indicating specificity of the KaiA3-KaiC3 interaction. No complex  
281 formation was detected between KaiA3 and KaiB3 (Fig. 2B, Fig. S5 and Fig. S6). In  
282 contrast, the formation of a large protein complex was observed when all three clock  
283 components, KaiA3, KaiB3, and KaiC3, were incubated together for 16 h at 30°C (Fig. 2B;  
284 Fig. S6). The size matches that of a complex consisting of one KaiC3 hexamer, six KaiA3  
285 dimers, and six KaiB3 monomers (840 kDa). The presence of KaiA3 in the complex was  
286 validated by western blot analysis using an anti-His antibody (Fig. 2B, Fig. S6). As  
287 expected, no such complex was formed when KaiA3 was replaced with *Synechococcus*  
288 KaiA (Fig. 2B). Moreover, no such complex was formed when KaiB3 was replaced by its  
289 isoform KaiB1, suggesting that KaiB3 is specific for KaiA3 as well and that KaiB3 might  
290 recruit KaiA3 to the KaiC3/KaiB3 complex (Fig. S6).

291 Previous studies have shown that KaiC3 has autokinase activity, which is independent of  
292 KaiA1<sup>25, 27</sup>. Since our studies revealed an interaction between KaiC3 and KaiA3, we were  
293 interested in probing the influence of KaiA3 on the phosphorylation of KaiC3. The  
294 recombinant Kai proteins described above were used for this purpose. KaiC3 was  
295 incubated for 16 h at 30°C in the presence or absence of other Kai proteins, and its  
296 phosphorylation state was analyzed by SDS-PAGE (Fig. 2C), and LC-MS/MS (Fig. S8).  
297 Since KaiC3 was partially phosphorylated after purification from *E. coli*, the protein  
298 preparation was incubated for 18 h at 30°C prior to the start of the assays. During this  
299 incubation period, KaiC3 autodephosphorylated, as is typical for KaiC proteins (Fig. 2C,  
300 NP-KaiC3)<sup>44</sup>. Addition of KaiA3 led to phosphorylation of KaiC3, while the presence of  
301 *Synechococcus* KaiA had no influence on the phosphorylation state of KaiC3. In contrast,  
302 KaiC3 dephosphorylation was enhanced by KaiB3 (Fig. 2C, upper panel). Replacing  
303 KaiB3 with its isoform, KaiB1, in samples containing KaiA3, maintained KaiC3 in the  
304 phosphorylated state (Fig. 2C, lower panel). Analysis of KaiC3 phosphorylation by LC-  
305 MS/MS- identified the neighboring residues Ser423 and Thr424 as phosphorylation sites,  
306 which are conserved across KaiC homologs (Fig. S8). Based on these analyses, we  
307 conclude that KaiA3 likely has a KaiA-like function in promoting the phosphorylation of  
308 KaiC3. Neither *Synechococcus* KaiA nor *Synechocystis* KaiB1 could substitute for KaiA3  
309 or KaiB3, respectively, demonstrating that the *Synechocystis* KaiA3/KaiB3/KaiC3 proteins  
310 represent a separate functional complex. Only KaiA3 stimulated the autokinase activity of  
311 KaiC3, which in turn promoted its interaction with KaiB3. Interaction with KaiB3, but not  
312 KaiB1, enhances the dephosphorylation of KaiC3.

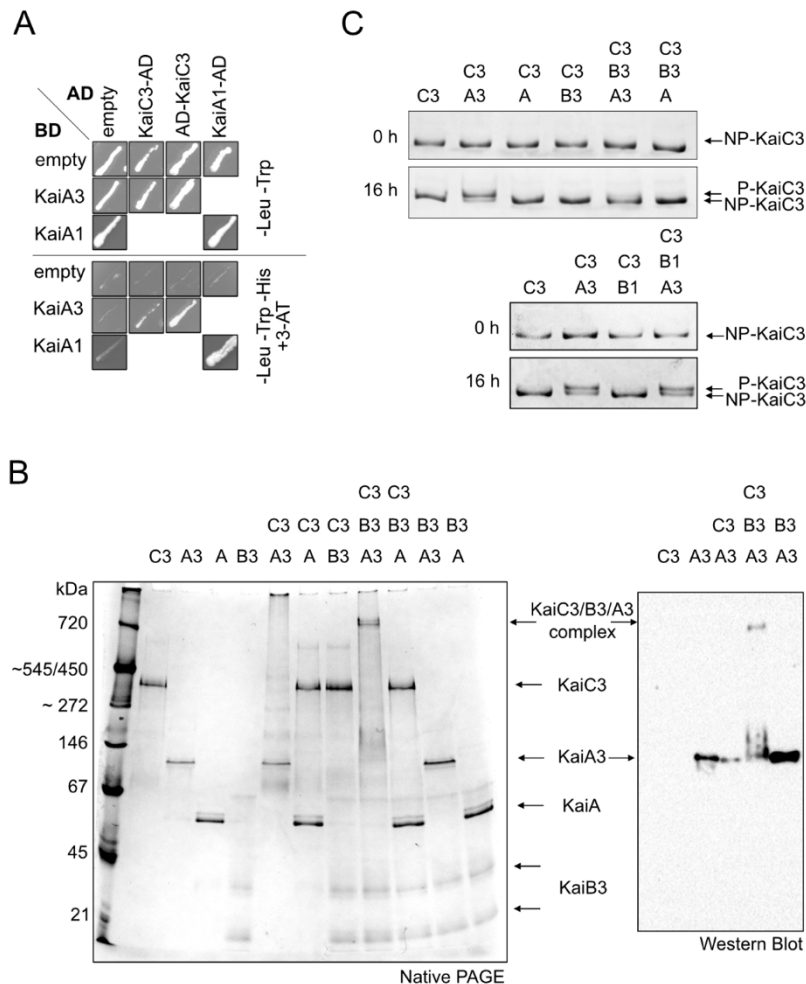

313

314 **Fig. 2.** Analysis of KaiA3 protein interactions and KaiC3 phosphorylation. (A) YTH interaction  
 315 analysis of KaiA3 with KaiC3. The KaiA1 dimer interaction was used as a positive control. YTH  
 316 reporter strains carrying the respective bait and prey plasmids were selected by plating on complete  
 317 supplement medium (CSM) lacking leucine and tryptophan (-Leu -Trp). AD, GAL4 activation  
 318 domain; BD, GAL4 DNA-binding domain; empty, bait, and prey plasmids without protein sequence  
 319 (only AD/BD domain). The physical interaction between bait and prey fusion proteins was  
 320 determined by growth on complete medium lacking leucine, tryptophan, and histidine  
 321 (-Leu -Trp -His) and the addition of 12.5 mM 3-amino-1,2,4-triazole (3-AT). The BD was fused to  
 322 the N-terminus of KaiA3. For a clear presentation, spots were assembled from several replicate  
 323 assays (original scans are shown in Fig. S5). (B) Interaction analysis of the recombinant Kai  
 324 proteins on native polyacrylamide gels. Proteins were incubated for 16 h at 30°C and subsequently  
 325 subjected to 4-16% clear native PAGE. Gels were either stained with Coomassie Blue (left side) or  
 326 blotted and immunodecorated with a monoclonal anti-His antibody to detect recombinant KaiA3-  
 327 His6 (right side). Recombinant *Synechococcus* KaiA was used for comparison. (C) KaiC3  
 328 phosphorylation depends on the presence of KaiA3 and KaiB3. KaiC3 was dephosphorylated by  
 329 incubating for 18 h at 30°C prior to the start of the assay (NP-KaiC3). 0.2 µg/µl NP-KaiC3 was  
 330 incubated at 30°C in the presence or absence of 0.1 µg/µl *Synechocystis* KaiA3, KaiB3 and KaiB1  
 331 and *Synechococcus* KaiA, respectively. Aliquots were taken at 0 h and 16 h, followed by separation  
 332 on a high-resolution LowC SDS-PAGE gel in Tris-Tricine buffer and staining with Coomassie blue.  
 333 A slow-migrating band representing the phosphorylated form of KaiC3 (P-KaiC3) was observed  
 334 only in the presence of KaiA3.

335 *KaiC3 phosphorylation oscillates in vitro and in Synechocystis cells*

336

337 The opposing effects of KaiA3 and KaiB3 on KaiC3 phosphorylation imply that these three  
338 *Synechocystis* proteins may form a functional *in vitro* oscillator. We monitored the  
339 phosphorylation of KaiC3 in concert with KaiB3 and various concentrations of KaiA3 over  
340 a period of 48 h (Fig. 3A, B; Fig. S9). In the presence of 1.4  $\mu$ M and 2.8  $\mu$ M KaiA3  
341 (corresponding to a ~1:1.2 and 1:2.4 stoichiometry of KaiA3:KaiC3), we could reconstitute  
342 ~24h oscillations in KaiC3 phosphorylation (Fig. 3A, B; Fig. S9). Compared to the  
343 *Synechococcus* KaiABC oscillator<sup>48, 49</sup>, lower KaiA3 concentrations failed to generate  
344 oscillations and the protein was mainly dephosphorylated. The stimulating effect of KaiA3  
345 on KaiC3 phosphorylation was saturated at a KaiA3 concentration of 4.2  $\mu$ M, which  
346 corresponds to a KaiA3:KaiC3 stoichiometry of 1:0.8. Hence, the KaiC3 oscillations were  
347 clearly dependent on the KaiA3 concentration.

348 To evaluate whether the self-sustained KaiC3 phosphorylation rhythms detected above  
349 are also present in *Synechocystis* cells and are diurnal or circadian in nature, we grew  
350 cells in a light/dark cycle, followed by constant illumination. We separated whole-cell  
351 extracts on a Phostag gel and identified KaiC3 by Western blot analysis (Fig. 3C) using a  
352 KaiC3-specific antibody<sup>27</sup>. We detected 4-5 bands which partially overlapped or were  
353 slightly shifted in comparison to the bands detected in the  $\Delta kaiC3$  strain. It seems that  
354 there is some cross-reaction with KaiC1, KaiC2 or another protein. The two prominent  
355 bands indicated in Fig. 3C and which are absent in the  $\Delta kaiC3$  strain most probably reflect  
356 two different phosphorylation states of KaiC3. Based on the *in vitro* data with the isolated  
357 Kai proteins and their similar migration patterns in Phos-tag SDS-PAGE analysis  
358 compared to the whole cell extract (Fig. S9C), we suppose that the very upper (red arrow)  
359 and one of the lower bands (blue arrow) in Fig. 3C represent the fully phosphorylated and  
360 non-phosphorylated forms of KaiC3, respectively. In the  $\Delta kaiA3$  mutant, the lowest band  
361 was mainly present, indicating that KaiC3 was mostly dephosphorylated in this strain.  
362 Incubation of KaiC3 with Lambda phosphatase resulted in comparable accumulation of  
363 the lower band (Fig. S9D). In contrast, in the KaiA3 overexpression strain, KaiC3 was  
364 highly phosphorylated in comparison to the wild type (Fig. 3C). In addition, two or more  
365 bands were detected in the *in vitro* assays, as well as in the cell extracts (Fig. 3B, C; Fig.  
366 S9C) which partly overlapped with an unspecific band detected in the  $\Delta kaiC3$  strain in  
367 Phos-tag SDS-PAGE analysis. These bands might reflect single phosphorylated states of  
368 KaiC3. In summary, our *in vitro* and *in vivo* data demonstrate that KaiC3 phosphorylation  
369 strongly depended on KaiA3. Furthermore, KaiC3 phosphorylation showed sustained  
370 oscillations with a 24 hours rhythm in *Synechocystis*, hence displaying a characteristic  
371 feature of a circadian oscillator.

372

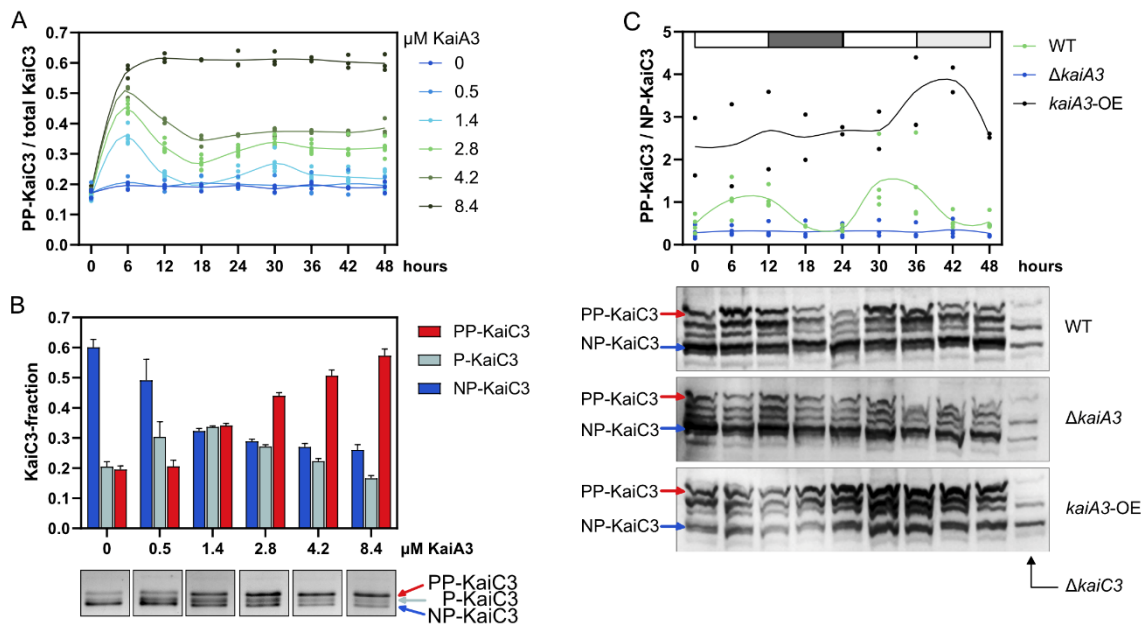

373

374 **Fig. 3.** Analysis of KaiA3-dependent KaiC3 phosphorylation. (A) KaiC3 (3.4  $\mu\text{M}$ ) was incubated  
 375 with KaiB3 (7.4  $\mu\text{M}$ ) and various concentrations of KaiA3 at 30°C. Aliquots incubated for the  
 376 indicated time periods were applied to a high-resolution LowC SDS-PAGE gel, proteins were  
 377 separated in Tris-glycine buffer, and the relative band densities of the different KaiC3  
 378 phosphorylation states: unphosphorylated (NP), single-phosphorylated (P), and double-  
 379 phosphorylated (PP) were estimated densitometrically. (A) *In vitro* ratio of fully phosphorylated  
 380 KaiC3 (PP-KaiC3) to total KaiC3 at various concentrations of KaiA3. Dots display replicates (n=3);  
 381 the line represents an akima spline curve. Assays with 1.4  $\mu\text{M}$  KaiA3 and 2.8  $\mu\text{M}$  KaiA3 were each  
 382 analyzed twice on the gel, resulting in 6 replicates in total. Representative gels from each assay  
 383 are shown in Fig. S9A. (B) Detailed analysis of KaiC3 phosphorylation after 6h of incubation with  
 384 different KaiA3 concentrations. The fractions of double (PP), single (P), and unphosphorylated KaiC  
 385 (NP-KaiC3) are plotted as average +SD from the three assays, also shown in A. Below the graph,  
 386 representative band patterns are shown (assembled from Fig. S9A). (C) The ratio of fully  
 387 phosphorylated KaiC3 (PP-KaiC3) to non-phosphorylated KaiC3 (NP-KaiC3) in *Synechocystis* wild-  
 388 type, *kaiA3* mutant ( $\Delta\text{kaiA3}$ ), and *kaiA3* overexpression (*kaiA3-OE*) strains (Fig. S1). Whole cell  
 389 extracts were separated using Phos-tag SDS-PAGE and immunodecorated with a KaiC3-specific  
 390 antiserum. Samples were collected every 6 h from cells grown in a 12-h light/dark cycle, followed  
 391 by constant light. The white and dark gray boxes represent light and dark periods, respectively, and  
 392 the light gray box represents the subjective night. Representative blots are shown. Whole cell  
 393 extracts from the *Synechocystis*  $\Delta\text{kaiC3}$  mutant (12 h time point) were used as a control. Dots in  
 394 the graph display the replicates (n=2-3); the line represents an akima spline curve. Plots were  
 395 generated using GraphPad Prism, version 9.5.1.

396

397 *Deletion of kaiA3 impacts growth and viability during mixotrophic and chemoheterotrophic*  
398 *growth*  
399

400 What is the function of this additional Kai protein oscillator in *Synechocystis*? In our  
401 laboratory, deletion of *kaiC3* led to growth impairment in complete darkness on glucose,  
402 but not in light/dark cycles<sup>25</sup>; thus, the *kaiA3* knockout mutant ( $\Delta kaiA3$ ) was analyzed  
403 under various growth conditions. The cells were grown in liquid culture under constant  
404 light, plated on agar at different dilutions, and grown photoautotrophically (Fig. 4A) and  
405 photomixotrophically (Fig. 4B) under continuous light and 12-h light/12-h dark cycles or  
406 chemoheterotrophically (Fig. 4C). Because the strains grew very slowly under  
407 chemoheterotrophic conditions, the cells were spotted at higher concentrations under  
408 these conditions. There were no differences in the viability of the mutant strains in  
409 comparison to that of the wild type under photoautotrophic conditions in continuous light  
410 and light/dark cycles. Under photomixotrophic conditions, the  $\Delta kaiA3$  strain showed less  
411 viability, which was partly restored by re-insertion of *kaiA3*. It appears that the amount of  
412 KaiA3 is critical for the function of the system, which is consistent with our data on KaiA3-  
413 dependent KaiC3 phosphorylation (Fig. 3). Surprisingly, the mutant strain lacking all three  
414 alternative *kai* genes ( $\Delta kaiA3B3C3$ ) exhibited a different growth phenotype under  
415 photomixotrophic conditions. In light/dark cycles, this strain grew well and seemed to have  
416 some advantages in comparison to the wild type (Fig. 4B). Spot assays under  
417 chemoheterotrophic conditions provided a clearer picture; the mutant strain lacking *kaiA3*  
418 and the triple knockout showed a similar phenotype. They were unable to grow in complete  
419 darkness, and this ability was fully restored in the complementation strain (Fig. 4C). These  
420 results coincide with previously detected impairments displayed by the  $\Delta kaiC3$  strain  
421 during chemoheterotrophic growth<sup>25</sup>, strengthening the idea that the non-standard KaiA3-  
422 KaiB3-KaiC3 system is a regulatory complex with the same function.



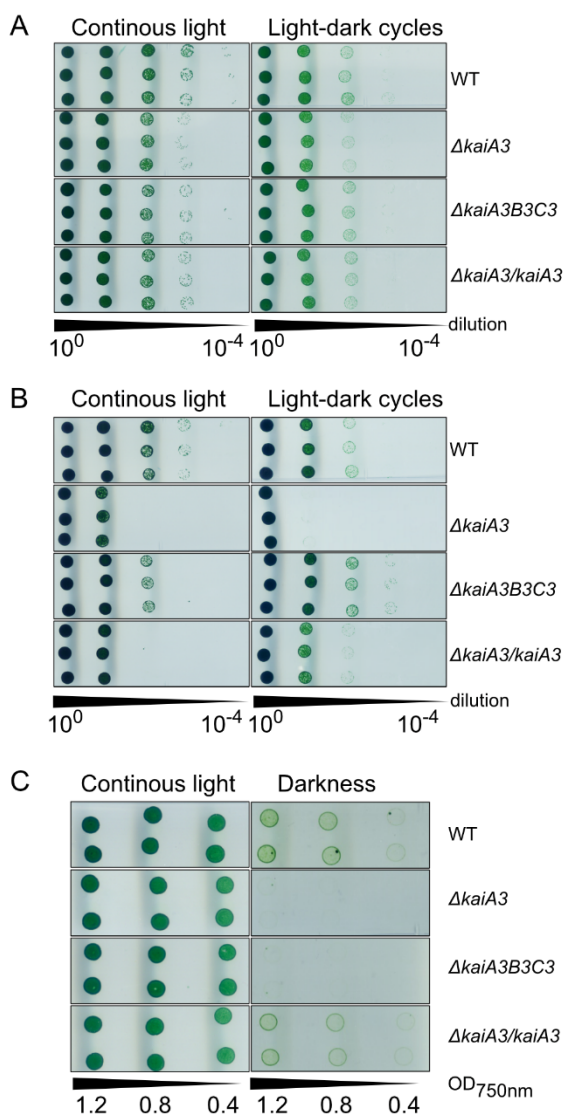

423

424

425 **Fig. 4.** Deletion of *kaiA3* results in growth defects during mixotrophic and chemoheterotrophic  
 426 growth. Proliferation of the wild type (WT), the  $\Delta kaiA3$  and  $\Delta kaiA3B3C3$  deletion mutants, and the  
 427  $\Delta kaiA3/kaiA3$  complementation strain was tested under (A) phototrophic (continuous  
 428 light, - glucose), (B) photomixotrophic (continuous light, + glucose), and (C) heterotrophic  
 429 (darkness, + glucose) conditions. Strains were grown in liquid culture under constant light, and  
 430 different dilutions were spotted on agar plates and incubated under the indicated light conditions  
 431 with a light phase corresponding to  $75 \mu\text{mol photons m}^{-2} \text{s}^{-1}$  white light. Representative result from  
 432 three independent experiments are shown. (A) Cultures were diluted to an  $OD_{750nm}$  value of 0.4,  
 433 and tenfold dilution series were spotted on agar plates. Plates were analyzed after 6 or 8 days of  
 434 continuous light and 12h/12h light/dark cycles, respectively. (B) Same as (A), but the cells were  
 435 spotted on agar plates containing 0.2 % glucose. (C) Cultures were diluted to  $OD_{750nm}$  values of  
 436 1.2, 0.8, and 0.4, and spotted on agar plates supplemented with 0.2% glucose. The plates were  
 437 analyzed after 3 and 26 d of continuous light and darkness, respectively.

438

## 439 Discussion

440

441 Our knowledge of the function, composition, and network of clock systems in prokaryotes,  
442 including cyanobacteria, is increasing steadily. Even though multiple copies of the core  
443 clock proteins KaiB and KaiC are encoded in bacterial genomes, the canonical KaiA was  
444 found only as a single copy in Cyanobacteria yet<sup>26, 27, 42, 50</sup>. By identifying a chimeric KaiA3  
445 and verifying its interaction with the KaiB3-KaiC3 complex, we added another component  
446 to the diversity of bacterial clock systems.

447

### 448 *KaiA-like proteins outside of Cyanobacteria and primordial clocks*

449

450 In addition to KaiA3, new putative KaiA orthologs have been bioinformatically identified in  
451 prokaryotes outside Cyanobacteria<sup>42</sup>. Therefore, we suggest that such proteins may play  
452 a previously overlooked role in KaiB-KaiC-based systems. Exploring this possibility could  
453 provide valuable insights into unanswered research questions, such as the mechanism  
454 responsible for the rhythmic processes observed in *Rhodospirillum rubrum*. Indeed, this  
455 purple bacterium lacks KaiB1 and KaiC1 orthologs but possesses KaiA3, KaiB3, and  
456 KaiC3 (53) (Figure 1). Notably, the recently described oscillator from *Rhodobacter*  
457 *sphaeroides* (*Rhodobacter*), which consists of homologs of KaiC2 and KaiB2, can form an  
458 hourglass timer. This primordial *Rhodobacter* clock can function without KaiA. However,  
459 the *Rhodobacter* KaiB2-KaiC2 system requires an environmental signal to reset the  
460 clock<sup>22</sup>. A similar primordial clock has been suggested to be present in  
461 *Rhodopseudomonas palustris*<sup>21</sup> and the cyanobacterium *Prochlorococcus* MED4<sup>30, 31</sup>.  
462 However, other bacterial KaiB and KaiC homologs, including the KaiC2-KaiB2 system  
463 from *Synechocystis*, are believed to have clock-independent functions<sup>17, 51, 52</sup>.

464 It has been proposed that *kaiC* is the oldest evolutionary member of circadian clock  
465 genes<sup>50</sup>. KaiC homologs can be found even in Archaea where it was found to control e. g.  
466 motility of *Sulfolobus acidocaldarius* by protein interaction<sup>53</sup>. The later addition of KaiB was  
467 enough to form a primordial timekeeper which needs a signal for daily resetting of the  
468 clock<sup>21, 22, 30, 31</sup>. In *Rhodobacter* KaiC2, dephosphorylation is regulated by the stability of  
469 coiled-coil interactions between two connected hexamers as well as by KaiB<sup>22</sup>. However,  
470 whether autophosphorylation or dephosphorylation dominates depends primarily on the  
471 ATP/ADP ratio. Hence, the KaiC2-KaiB2 timer cannot oscillate autonomously but  
472 responds to changing ATP/ADP levels. Therefore, it was suggested that the *Rhodobacter*  
473 clock represents an ancient timer that depends on changes in photosynthetic activity  
474 during the day-night switch<sup>22</sup>.

475 With the evolution of KaiA, a self-sustained oscillator was developed that allowed for true  
476 circadian oscillations in gene expression, which can be observed in cyanobacteria. Why  
477 does KaiC require KaiA to drive persistent oscillations? By default, the A-loops of  
478 *Synechococcus* KaiC hexamers adopt a buried conformation, which inhibits  
479 autophosphorylation. Only the binding of KaiA favors phosphorylation by stabilizing A-loop  
480 exposure<sup>5</sup>. In contrast, *Rhodobacter* KaiC2 constantly exposes its A-loops, sterically  
481 allowing high intrinsic phosphorylation<sup>22</sup>.

482 The interacting residues between KaiA and KaiC are less conserved in both *Synechocystis*  
483 KaiA3 and KaiC3<sup>27, 54</sup> (Fig. 1). Since we demonstrated an interaction between KaiC3 and  
484 KaiA3, it is likely that co-evolution of the two proteins occurred. Another remarkable feature  
485 of *Rhodobacter* KaiC2 is that the latter displays an extended C-terminus that connects two  
486 hexamers via coiled-coil interactions to adopt a homododecamer instead of a typical  
487 hexamer<sup>22, 55</sup>. KaiC3 does not have such an extended C-terminus<sup>27</sup>, and we only observed  
488 the formation of hexamers or smaller oligomers<sup>25</sup> (Fig. 2).

489

#### 490 *The two-domain architecture of KaiA3 and complex formation*

491

492 KaiA3 formed a distinct clade at the basis of the KaiA clade. Apart from its presence in the  
493 N-terminal domain of phosphatase RsbU of *Bacillus subtilis*, a distinctive structure of the  
494 KaiA C-terminus has rarely been observed<sup>45</sup>. RsbU acts as a positive regulator of the  
495 alternative sigma factor B, which is involved in the general stress response<sup>56</sup>. The N-  
496 terminal domain of RsbU forms dimers similar to KaiA, and the proposed binding site for  
497 its corresponding activator, RsbT, is in an equivalent location to the KaiC-binding site on  
498 KaiA<sup>45</sup>. These findings may reflect how protein domains change during evolution, while  
499 their original functions are conserved. However, a link between RsbU and the recently  
500 proposed circadian clock in *Bacillus subtilis* has not yet been identified<sup>57</sup>. Moreover,  
501 circadian rhythms have been observed in several prokaryotes that do not encode Kai  
502 orthologs, suggesting the convergent evolution of circadian rhythms in prokaryotes<sup>57, 58</sup>.  
503 Further in-depth analyses are needed to elucidate whether KaiA3, together with KaiB3  
504 and KaiC3, or the well-studied *Synechococcus* circadian clock present a more ancestral  
505 system, because analysis of a larger dataset recently suggested that the canonical *kaiA*  
506 gene evolved at the same time as cyanobacteria<sup>42</sup>.

507 Taken together, these data are consistent with a model in which KaiA3 can fulfill the  
508 functions of a true KaiA homolog, such as dimerization, binding to KaiC3, and enhancing  
509 KaiC3 autophosphorylation. Other mechanistic processes, such as sequestration to the  
510 CI ring by binding to KaiB3, remain to be investigated but are clearly possible. By mixing  
511 KaiA3, KaiB3, and KaiC3, we reconstituted a *bona fide in vitro* oscillator (Fig 3A),  
512 suggesting that the observed in vivo oscillation of KaiC3 phosphorylation can run  
513 independently of the KaiA1B1C1 clock, and that the amount of KaiA3 is critical for the  
514 phosphorylation rhythm.

515 The *Rhodobacter* hourglass-like timer requires environmental cues for daily resetting.  
516 However, entrainment by metabolites has also been described for more elaborate, true  
517 circadian oscillators. In addition to entrainment by the input kinase CikA<sup>59</sup>, the  
518 *Synechococcus* clock can be entrained directly by the ATP/ADP ratio and oxidized  
519 quinones<sup>35, 60</sup>. Moreover, CikA does not sense light directly but perceives the redox state  
520 of the plastoquinone pool<sup>61, 62</sup>. In addition, glucose feeding can entrain *Synechococcus*  
521 when engineered to take up glucose<sup>63</sup>. In plants, it has been demonstrated that both  
522 exogenous sugars and internal sugar rhythms resulting from cyclic photosynthetic activity  
523 entrain the clock<sup>64</sup>. *Synechocystis* can naturally utilize glucose, which may make it even  
524 more susceptible to metabolic entrainment by sugars. Notably, the *Synechocystis* wild-

525 type strain used in this study was able to grow in complete darkness when supplemented  
526 with glucose. This is different from an earlier study that showed that *Synechocystis* needs  
527 a 5 min blue-light pulse at least once a day to grow heterotrophically in the dark<sup>65</sup>. The  
528 authors described this behavior as light-activated heterotrophic growth. There are no  
529 studies that explain why cells require this short light pulse, but it is also clear that our  
530 laboratory strain grows fully chemoheterotrophically<sup>29</sup>.

531 In contrast to *Synechococcus*, CikA from *Synechocystis* is a true photoreceptor that binds  
532 a chromophore<sup>66</sup>. Thus, it remains unclear whether CikA has a similar function in both  
533 cyanobacteria, and whether it interacts with both circadian clock systems in  
534 *Synechocystis*. The high structural similarity of the N-terminal domain of KaiA3 to  
535 response regulator domains from other organisms indicates that the core structure and  
536 activity are maintained, while adaptivity and variation provide specificity for acting in  
537 distinct pathways<sup>24</sup>. Within KaiA3, the aspartate residue crucial for phosphorylation is  
538 conserved. Theoretically, the protein could receive an input signal from a cognate histidine  
539 kinase, which has not yet been identified. Thus, there are potentially important differences  
540 related to input and output factors, and possibly entrainment of different cyanobacterial  
541 circadian clock systems.

542

#### 543 *The function of KaiA3 in Synechocystis*

544

545 The physiological function of the KaiA3-KaiB3-KaiC3 clock system seems to be related to  
546 the different metabolic modes of *Synechocystis*. Mutants deficient in *kaiA3* lose the ability  
547 to grow chemoheterotrophically on glucose, which is an aggravated effect compared to  
548 *kaiC3*-deficient mutants, which merely show reduced growth rates during heterotrophy<sup>25</sup>.  
549 Similarly, in *Synechococcus*, the disruption of *kaiA* led to one of the most severe effects  
550 on activity loss and was traced back to the unbalanced output signaling of the circadian  
551 clock<sup>67</sup>. The overaccumulation of KaiA3 also appeared to disturb the system (Fig. S10).  
552 Such an effect was also shown for the *Synechococcus* clock system, in which increased  
553 KaiA levels promote the hyperphosphorylation of KaiC<sup>6, 68</sup>, thereby deactivating rhythmic  
554 gene expression<sup>69</sup>. Surprisingly, inactivation of the complete KaiA3-KaiB3-KaiC3 system  
555 resulted in a different phenotype. While growth in darkness on glucose was strongly  
556 affected, similar to the single mutants, photomixotrophic growth was even slightly better  
557 in the *kaiA3B3C3* strain compared to the wild type. It is possible that in the absence of  
558 KaiA3, the altered interaction of KaiC3 with KaiC1 leads to aggravated growth defects in  
559 the  $\Delta$ *kaiA3* mutant. However, when a complete oscillator is missing, the KaiA1B1C1  
560 oscillator can compensate for this under certain growth conditions.

561 In *Synechocystis*,  $\Delta$ *kaiA3*-like phenotypes, such as impaired viability during light/dark  
562 cycles or complete loss of chemoheterotrophic growth on glucose, were also observed for  
563  $\Delta$ *kaiA1B1C1*,  $\Delta$ *sasA*, and  $\Delta$ *rpaA* mutants<sup>29, 70</sup>. For  $\Delta$ *sasA*, it was shown that the mutant  
564 strain was able to accumulate glycogen but was unable to utilize the storage compound  
565 to grow heterotrophically, probably because of its inability to catabolize glucose<sup>70</sup>. A recent  
566 metabolomics study suggested that the growth inhibition of  $\Delta$ *kaiA1B1C1* and  $\Delta$ *rpaA*  
567 mutants in a light/dark cycle might be at least partly related to a defect in the inhibition of

568 the RuBisCo enzyme in the dark and increased photorespiration, leading to the  
569 accumulation of the potentially toxic product 2-phosphoglycolate<sup>71</sup>. This previous study  
570 also revealed an enhanced growth defect in  $\Delta kaiA1B1C1$  and  $\Delta rpaA$  mutants under  
571 photomixotrophic conditions in light/dark cycles, similar to the  $\Delta kaiA3$  strain in the current  
572 study. This further supports the idea that one of the functions of the KaiA3-B3-C3 system  
573 is to fine-tune the core clock system, KaiA1B1C1. Clearly, there is a difference in the  
574 phenotypes between our study and the results demonstrated by Zhao et al.<sup>17</sup>, who  
575 analyzed single and double *kaiB3* and *kaiC3* knockout strains. In light/dark cycles, the  
576 *kaiB3C3* knockout strain showed a reduced growth rate compared to the wild-type control  
577 under photoautotrophic conditions. However, under constant light, this mutant showed a  
578 reduced growth rate and was outcompeted by the wild-type cells in mixed cultures.  
579 Photoheterotrophic and heterotrophic conditions were not tested in this study.  
580 *Synechocystis* strains used in different laboratories can vary in their genome and  
581 phenotypic characteristics, including glucose sensitivity (see for example<sup>28, 72</sup>). As the input  
582 and output pathways of the new oscillator are unknown, it is possible that mutations in  
583 different wild-type variants lead to variations in the expression of phenotypic effects in the  
584 clock mutants.

585 Here, we demonstrate that KaiA3 is a novel KaiA homolog and element of the KaiC3-  
586 based signaling pathway and has canonical KaiA functions. The N-terminal half of KaiA3  
587 may still have a response regulatory function; however, the exact mechanism remains  
588 unclear. Among other actions, KaiA3 must be placed within the regulatory and metabolic  
589 networks of *Synechocystis*. Finally, our findings in the cyanobacterium *Synechocystis*  
590 demonstrated the parallel presence of two circadian protein oscillators within a single cell.

591

## 592 **Materials and Methods**

593

### 594 *Reciprocal BLAST of Sll0485 (KaiA3) and Slr1783 (Rre1)*

595 Reciprocal BLAST was performed as described by Schmelling *et al.*<sup>26</sup>. The 2017 database  
596 was used for comparison with existing data on other circadian clock proteins. The protein  
597 sequences of Sll0485 (KaiA3) and Slr1783 (Rre1), as a reference for NarL response  
598 regulators<sup>43</sup> from *Synechocystis*, were used as query sequences for this reciprocal  
599 BLAST.

600

### 601 *Co-occurrence analysis*

602 The co-occurrence of KaiA3 with other circadian clock proteins in Cyanobacteria  
603 containing KaiC1 was examined according to Schmelling *et al.*<sup>26</sup>. A right-sided Fisher's  
604 exact test was used<sup>73</sup>. P-values were corrected for multiple testing after Benjamini-  
605 Hochberg<sup>74</sup>, with an expected false discovery rate of  $10^{-2}$ . All proteins were clustered  
606 according to their corrected p-values.

607

### 608 *Synteny analyses using SyntTax*

609 The conservation of gene order was analyzed using the web tool 'SyntTax'<sup>75</sup>;  
610 <https://pubmed.ncbi.nlm.nih.gov/23323735/>. If not mentioned otherwise, default settings



611 (Best match, 10 % norm. BLAST) were applied. Chromosomes were selected manually  
612 according to the results of Schmelling *et al.*<sup>26</sup>.

613

#### 614 *Multiple sequence alignments with Mafft and Jalview*

615 Sequence alignments, visualization, and analysis were performed with 'Jalview'<sup>76</sup>. The  
616 sequences were aligned with Mafft, and if not mentioned otherwise, default settings (L-  
617 INS-i, pairwise alignment computation method - localpair using Smith-Waterman  
618 algorithm, gap opening penalty: 1.53, gap opening penalty at local pairwise alignment: -  
619 2.00, group-to-group gap extension penalty: 0.123, matrix: BLOSUM62) were applied<sup>77</sup>.  
620 For analyses of the C-terminus, the alignments were trimmed to position 168 in the KaiA  
621 reference sequence of *Synechococcus*. After trimming, the alignment was recalculated  
622 with Mafft using the aforementioned default parameters.

623

#### 624 *2D and 3D structure predictions*

625 The alignments generated in Jalview were then used with 'Ali2D' for secondary structure  
626 prediction<sup>78</sup> [ref <https://toolkit.tuebingen.mpg.de>]. The identity cut-off to invoke a new  
627 PSIPRED run was set to 30%. Three-dimensional protein structures were modeled using  
628 either Phyre2 or SWISS-MODEL<sup>79, 80</sup>  
629 (<http://www.sbg.bio.ic.ac.uk/phyre2/html/page.cgi?id=index>;  
630 <https://swissmodel.expasy.org/>). The resulting structures were analyzed and illustrated  
631 using UCSF Chimera<sup>81</sup> (<https://www.cgl.ucsf.edu/chimera/>).

632

#### 633 *Phylogenetic reconstruction of protein trees*

634 Phylogenetic reconstruction of the protein trees of SII0485 (KaiA3), Slr1783 (Rre1)/NarL  
635 (*E. coli*, UniProtKB - P0AF28), and KaiA was achieved with MEGA X<sup>82, 83</sup> using the above  
636 constructed alignments. For all alignments, a neighbor-joining tree and maximum  
637 likelihood tree were constructed and compared. To construct neighbor-joining trees, 1000  
638 bootstrap iterations with a p-distance substitution model and a gamma distribution with  
639 three gamma parameters were used. To construct maximum likelihood trees, an initial tree  
640 was constructed using the maximum parsimony algorithm. Further trees were constructed  
641 using 1000 bootstrap iterations with an LG-G substitution model, a gamma distribution  
642 with three gamma parameters, and nearest-neighbor-interchange (NNI) as the heuristic  
643 method.

644

#### 645 *Yeast two-hybrid assay*

646 AH109 yeast cells (Clontech) were used for yeast two-hybrid experiments. Transformation  
647 of yeast cells was performed according to the manufacturer's guidelines using the Frozen-  
648 EZ Yeast Transformation Kit (Zymo Research). Genes of interest were amplified from wild-  
649 type genomic DNA using Phusion Polymerase (NEB), according to the manufacturer's  
650 guidelines. The indicated restriction sites were introduced using oligonucleotides listed in  
651 Table S1A. Vectors and PCR fragments were cut with the respective restriction enzymes,  
652 and the gene of interest was ligated into the vector, leading to a fusion protein with a GAL4  
653 activation domain (AD) or GAL4 DNA-binding domain (BD) either at the N- or C-terminus.

654 All constructed plasmids are listed in Table S2B. The detailed protocol for the growth  
655 assay can be found in protocols.io ([dx.doi.org/10.17504/protocols.io.wcnfave](https://doi.org/10.17504/protocols.io.wcnfave)).  
656 Successfully transformed cells were selected on a complete supplement mixture (CSM)  
657 lacking leucine and tryptophan (-Leu -Trp) dropout medium (MP Biochemicals) at 30°C for  
658 3-4 days. Cells containing bait and prey plasmids were streaked on CSM lacking leucine,  
659 tryptophan, and histidine (-Leu -Trp -His) dropout medium (MP Biochemicals) with the  
660 addition of 12.5 mM 3-amino-1,2,4-triazole (3-AT, Roth) and incubated for 6 days at 30°C  
661 to screen for interactions.

662

#### 663 *Expression and purification of recombinant Kai proteins*

664 *Synechocystis* KaiB3, KaiB1 and *Synechococcus* KaiA (plasmids kindly provided by T.  
665 Kondo, Nagoya University, Japan) were produced as GST-fusion proteins in *E. coli*  
666 BL21(DE3) as described in<sup>25</sup> ([https://www.protocols.io/view/expression-and-purification-](https://www.protocols.io/view/expression-and-purification-of-gst-tagged-kai-prot-48ggzwtw)  
667 [of-gst-tagged-kai-prot-48ggzwtw](https://www.protocols.io/view/expression-and-purification-of-gst-tagged-kai-prot-48ggzwtw)). Briefly, proteins were purified by affinity chromatography  
668 using glutathione-agarose 4 B (Macherey and Nagel), and the N-terminal GST-tag was  
669 removed using PreScission Protease (Cytiva) prior to elution of the untagged proteins from  
670 the glutathione resin. *Synechocystis* KaiC3 was produced with an N-terminal- Strep-tag  
671 (Strep-KaiC3) in *E. coli* Rosetta-gami B (DE3) cells and purified via affinity  
672 chromatography using Strep-tactin XT superflow (IBA-Lifesciences)<sup>25</sup>  
673 ([https://www.protocols.io/view/heterologous-expression-and-affinity-purification-](https://www.protocols.io/view/heterologous-expression-and-affinity-purification-meac3ae)  
674 [meac3ae](https://www.protocols.io/view/heterologous-expression-and-affinity-purification-meac3ae)). The *Synechocystis* ORF *sll0485*, encoding KaiA3, was inserted into the vector  
675 pET22b to create a C-terminal His6-fusion. KaiA3-His6 was expressed in *E. coli* Tuner  
676 (DE3) cells and purified by immobilized metal affinity chromatography (IMAC) using  
677 PureProteome™ Nickel Magnetic Beads (Millipore). For a detailed protocol, see at  
678 protocols.io ([dx.doi.org/10.17504/protocols.io.bu5bny2n](https://doi.org/10.17504/protocols.io.bu5bny2n)). Recombinant proteins were  
679 stored at -80°C in buffer containing 20 mM Tris, pH 8.0, 150 mM NaCl, 0.5 mM EDTA, 5  
680 mM MgCl<sub>2</sub>, and 1 mM ATP.

681

#### 682 *KaiC3 phosphorylation in in vitro assays and liquid chromatography mass spectrometry* 683 *(LC-MS/MS)*

684 Recombinant Strep-KaiC3 purified from *E. coli* exists mainly in its phosphorylated form  
685 (KaiC3-P). Fully dephosphorylated Strep-KaiC3 (KaiC3-NP) was generated by incubating  
686 the protein for 18 h at 30°C in assay buffer (20 mM Tris, pH 8.0, 150 mM NaCl, 0.5 mM  
687 EDTA, 5 mM MgCl<sub>2</sub>, and 1 mM ATP). The autokinase activity of KaiC3-NP was  
688 investigated by incubating 0.2 µg/µl KaiC3 for 16 h at 30°C in 20 µl assay buffer in the  
689 presence or absence of 0.1 µg/µl KaiA3-His6, KaiB3, and *Synechococcus* KaiA. Ten-  
690 microliter aliquots were taken before and after incubation at 30°C, and the reaction was  
691 stopped with SDS sample buffer. Samples were stored at -20°C prior to application to a  
692 high resolution LowC SDS gel (10% T, 0.67% C)<sup>84</sup> using the Hoefer Mighty small II gel  
693 electrophoresis system and Tris-Tricine running buffer (cathode buffer: 100 mM Tris, 100  
694 mM Tricine, 0.1 % SDS, pH 8.25; anode buffer: 100 mM Tris, pH 8.9, according to  
695 Schagger and von Jagow<sup>85</sup>). Gels were stained with Coomassie Blue R.

696 For the 48 h assay, pools containing 0.2 µg/µl (3.4 µM) KaiC3-NP, 0.1 µg/µl KaiB3 (7.4  
697 µM) and various concentrations of KaiA3-His6 (corresponding to 0.5 – 8.4 µM) were  
698 prepared in assay buffer supplemented with 5 mM ATP, split in 10 µl aliquots for the  
699 desired timepoints and stored at -80°C. Samples were thawed on ice for 10 min prior to  
700 incubation at 30°C for the different time periods. The reaction was stopped at specific time  
701 points by adding SDS sample buffer. Samples were stored at -80°C prior to application to  
702 a LowC SDS gel (10% T, 0.67% C)<sup>26</sup> using the Biorad Mini PROTEAN gel electrophoresis  
703 system and Tris-glycine running buffer (25 mM Tris, 192 mM glycine, 0.1 % SDS,  
704 according to Laemmli<sup>86</sup>). The gels were stained with ROTI@Blue quick stain. In Tris-glycine  
705 buffer, three KaiC3 bands could be separated, whereas two KaiC3 bands were separated  
706 in Tris-Tricine buffer.

707 For LC-MS/MS- based analysis of KaiC3 phosphorylation sites, Strep-KaiC3 and KaiA3  
708 were co-incubated *in vitro* as described above. Samples were taken directly after mixing,  
709 as well as after 2 and 6 h of incubation, and separated by SDS-PAGE. For each sample,  
710 protein-containing gel regions of Strep-KaiC size were cut out with a scalpel. For the 6 h  
711 time point, a gel region at the potential size of the Strep-KaiC3/A3 complex was also  
712 extracted. In-gel protein digestion with trypsin was performed as described by Shevchenko  
713 *et al.*<sup>87</sup>. The generated peptides were extracted and purified using the stage tip protocol<sup>88</sup>.  
714 Of the resulting peptide solution, 20% was used for nanoLC-MS/MS analysis. Therefore,  
715 peptides were separated in a 37 min reverse-phase linear gradient and directly ionized in  
716 an online coupled ESI source upon elution for analysis on a Q Exactive HF mass  
717 spectrometer (Thermo Fisher Scientific) operated in data-dependent acquisition mode.  
718 The 12 highest abundant multiply charged ions of each full scan were separately  
719 fragmented by HCD, and the generated fragment ions were analyzed in consecutive  
720 MS/MS scans. Raw data files were processed using MaxQuant software (version 1.5.2.8)  
721 and default settings. Phosphorylation of Ser, Thr, and Tyr was defined as a variable  
722 modification. Acquired m/z spectra were searched against the proteome databases of  
723 *Synechocystis* and *E. coli* (downloaded from cyanobase and Uniprot, respectively).  
724 Annotated MS/MS spectra were visualized using the MaxQuant viewer.

725

#### 726 *Clear native protein PAGE, Phos-tag SDS-PAGE and immunodetection*

727 Kai proteins (10 µl samples containing 2 µg dephosphorylated Strep-KaiC3, 1 µg KaiA3-  
728 His6, 1 µg KaiB3, 1 µg *Synechococcus* KaiA) were incubated for 16 h at 30°C in  
729 phosphorylation assay buffer, followed by separation of the native proteins in 4-16% native  
730 PAGE at 4°C using a clear native buffer system (Serva) without anionic dye. Thus, only  
731 proteins with a pI<7 at physiological pH were separated. Protein bands were visualized  
732 with Coomassie staining (ROTI@Blue Quick, Carl Roth) or immunodetected with a  
733 monoclonal anti-His antibody conjugated to HRP (MA1-21315-HRP, Thermo Fisher,  
734 1:2000 diluted). A detailed protocol can be found in protocols.io  
735 ([dx.doi.org/10.17504/protocols.io.bu67nzhn](https://dx.doi.org/10.17504/protocols.io.bu67nzhn)).

736 To analyze *the in vivo* phosphorylation of KaiC3, *Synechocystis* wild type,  $\Delta kaiA3$ , and  
737  $\Delta kaiC3$  cells were cultivated in BG11 or copper-depleted medium for *kaiA3*  
738 overexpression. After an initial 12h/12h light/dark cycle, 10 ml of cells were collected every

739 6 h for analysis. The cells were cooled in liquid nitrogen for 5 s and harvested by  
740 centrifugation (3220 × g, 2 min, 4°C). The pellet was frozen in liquid nitrogen and stored  
741 at -20°C until further processing. To lyse the cells, the pellets were resuspended to an  
742 OD<sub>750</sub> of 25 in phosphorylation buffer (50 mM NaOH-HEPES pH 7.5, 300 mM NaCl, 0.5  
743 mM Tris-(2-carboxyethyl)-phosphine, 10 mM MgCl<sub>2</sub>). The cells were disrupted twice in a  
744 cell mill at 30 Hz for 1 min at 4°C, using glass beads. The crude cell extract was obtained  
745 by centrifugation (500 × g, 1 min, 4°C). For mobility shift detection of phosphorylated and  
746 dephosphorylated KaiC3, a Zn<sup>2+</sup>-Phos-tag® SDS-PAGE assay (Wako Chemicals) was  
747 used. A 9% SDS-PAGE gel containing 25 μM Phos-tag acrylamide was prepared and 12  
748 μL of cell extract was run at 150 V for 3 h at 4°C. Proteins were blotted onto a nitrocellulose  
749 membrane (Amersham™ Protran®) via wet blotting. Immunodetection was performed  
750 using αKaiC3<sup>27</sup> and anti-rabbit secondary (Thermo Fisher Scientific Inc., USA) antibodies.

751

752 *Screening of KaiC3 and KaiC1 binding partners by immunoprecipitation-coupled liquid*  
753 *chromatography mass spectrometry (LC-MS/MS)*

754 *Synechocystis* WT/FLAG-*kaiC3*, WT/FLAG-*kaiC1*, and WT/FLAG-*sfGFP* (control) strains  
755 were cultivated in BG11 medium (100 ml, copper-depleted) and harvested by  
756 centrifugation at 6000 × g for 10 min at 4°C. According to Wiegard *et al.*<sup>27</sup>, cells were  
757 disrupted in a mixer mill, followed by solubilization with n-dodecyl-β-maltoside for 1 h. The  
758 supernatant was used for FLAG purification in pull-down assays with Anti-Flag® M2  
759 Magnetic Beads (Sigma-Aldrich), following the manufacturer's protocol. The resulting  
760 elution fractions were loaded onto a NuPAGE™ Bis-Tris Gel and run following the  
761 manufacturer's protocol (Invitrogen). Protein bands were allowed to migrate only a short  
762 distance of approximately 10 mm. After staining the gel for 60 min with InstantBlue™  
763 (Expedeon), the protein-containing gel regions were excised. Two independent replicates  
764 were produced for each condition (KaiC3, KaiC1, or control pull-down). In-gel protein  
765 digestion with trypsin was performed as described above, and the resulting peptide  
766 solutions were purified using stage tips. Approximately 20% of the sample was applied for  
767 nanoLC-MS/MS analysis as described above on a Q Exactive HF mass spectrometer  
768 (Thermo Fisher Scientific) operated in the data-dependent acquisition mode. Raw data of  
769 KaiC3 or KaiC1 pull-downs were separately processed using the MaxQuant software  
770 (version 1.5.2.8) embedded MaxLFQ algorithm as described by Cox *et al.*<sup>89</sup>. Raw spectra  
771 were searched against the proteome databases of *Synechocystis* and *E. coli* (downloaded  
772 from cyanobase and Uniprot, respectively) and the bait protein sequences. Significantly  
773 enriched proteins were identified by Perseus software (version 1.6.5.0) significance B  
774 analysis with a p-value- of 0.01.

775

776 *Strains and growth conditions*

777 Wild-type *Synechocystis* (PCC-M, resequenced<sup>28</sup>), the deletion strains  $\Delta rpaA$ <sup>37</sup>,  $\Delta kaiC3$ <sup>25</sup>,  
778  $\Delta kaiA3$ , and  $\Delta kaiA3B3C3$  (Fig. S1), and complementation strain  $\Delta kaiA3/kaiA3$  (Fig. S1)  
779 were cultured photoautotrophically in BG11 medium<sup>90</sup> supplemented with 10 mM TES  
780 buffer (pH 8) under constant illumination with 75 μmol photons m<sup>-2</sup> s<sup>-1</sup> of white light (Philips

781 TLD Super 80/840) at 30°C. Cells were grown either in Erlenmeyer flasks with constant  
782 shaking (140 rpm) or on plates (0.75% Bacto-Agar; Difco) supplemented with  
783 0.3% thiosulfate. For photomixotrophic experiments, 0.2% glucose was added to the  
784 plates. For chemoheterotrophic growth experiments in complete darkness, *Synechocystis*  
785 cells were spotted at different dilutions on BG11 agar plates containing 0.2% glucose and  
786 incubated either mixotrophically for three days with continuous illumination or  
787 chemoheterotrophically in the dark for 26 days.

788

#### 789 *Construction of mutants of the KaiC3 based clock system*

790 To construct the *kaiA3* (*sll0485*) deletion strain, *Synechocystis* wild-type cells were  
791 transformed with the plasmid pUC19- $\Delta$ *sll0485*. For plasmid construction, PCR products  
792 were generated using the oligonucleotides P13-P14 and pUC19 as template, P15-P16  
793 and P19-P20 with genomic *Synechocystis* wild-type DNA as template and P17-25 with  
794 pUC4K as template. Homologous recombination led to replacement of the *sll0485* gene  
795 with a kanamycin resistance cassette (Fig. S1). For genomic complementation of the  
796  $\Delta$ *sll0485* strain, cells were transformed with the plasmid pUC19- $\Delta$ *sll0485*-compl.  
797 Overlapping fragments were generated using the oligonucleotides P15-28 and P24-32  
798 with genomic *Synechocystis* wild-type DNA as template, P13-P26 and pUC19 as  
799 template, and P22-P23 and the vector pACYC184 as template. In the resulting  
800 complementation strain  $\Delta$ *kaiA3/kaiA3*, the kanamycin resistance cassette was replaced  
801 with *sll0485*, and a chloramphenicol resistance cassette was introduced downstream of  
802 the *kaiB3* gene (Fig. S1). For the triple-knockout mutant  $\Delta$ *kaiA3B3C3*,  $\Delta$ *kaiC3* cells were  
803 used as the background strain for transformation with the pUC19- $\Delta$ *kaiA3B3* plasmid. PCR  
804 products were generated using the oligonucleotides P13-P26 and pUC19 as template,  
805 P17-P27 and pUC4K as template, P15-P16 and P25-P28 with genomic *Synechocystis*  
806 wild-type DNA as template. The operon *kaiA3kaiB3* was replaced with a kanamycin  
807 resistance cassette (Fig. S1). Complete segregation of the mutant alleles was confirmed  
808 using PCR. For the  $\Delta$ *kaiA3* strain, oligonucleotides P15-P29 were used. Segregation of  
809 the complementation strain was confirmed by PCR with P15-P29, P30-P31, and P19-P32.  
810 For the triple knockout mutant  $\Delta$ *kaiA3B3C3*, deletion of the *kaiA3B3* operon was  
811 confirmed by PCR using the primer pairs P15-P33 and P19-P30. The *kaiA3B3*  
812 chromosomal region of the mutants is shown in Fig. S1.

813 Ectopic expression of *sll0485* was achieved in wild-type and  $\Delta$ *sll0485* cells after  
814 transformation with plasmid pUR-NFLAG-*sll0485*. The plasmid was constructed via  
815 restriction digestion of the vector pUR-N-Flag-xyz, and the PCR product was amplified  
816 with the oligonucleotide pair P29-P34 using genomic *Synechocystis* wild-type DNA as a  
817 template. Restriction digestion with EcoRI and BamHI was followed by ligation. Successful  
818 transformation was confirmed by PCR with P35-P36. The oligonucleotides and plasmids  
819 used are listed in Table S1.

820

#### 821 **Data availability**

822



823 The mass spectrometry proteomics data were deposited in the ProteomeXchange  
824 Consortium (<http://proteomecentral.proteomexchange.org>) via the PRIDE partner  
825 repository<sup>91</sup>, with the dataset identifier PXD0042846.

826

827 Datasets S1 to S3 were deposited on a server and can be accessed under the following  
828 link:

829 [https://supplements.biologie.uni-freiburg.de/the\\_non-standard\\_kaia3\\_regulator/](https://supplements.biologie.uni-freiburg.de/the_non-standard_kaia3_regulator/)

830 **Information for reviewers:** account: pilus, password: freecastle

831

### 832 **Acknowledgments**

833

834 We thank Research Unit FOR2816 'SCyCode' (The Autotrophy-Heterotrophy Switch in  
835 Cyanobacteria: Coherent Decision-Making at Multiple Regulatory Layers) funded by the  
836 German Research Foundation for fruitful discussions and financial support. This work was  
837 financially supported by grants (WI2014/5-3; 10-1; AX 84/1-3 and MA 4918/4-1) from the  
838 German Research Foundation to A.W., I.M.A., and B.M., respectively. We thank Pauline  
839 Morys, Annika Klopp, Isabell Bleile, Werner Bigott, and Petra Kolkhof for technical  
840 assistance.

841

842

843

844 **References**

845

846 1. Nakajima M, *et al.* Reconstitution of circadian oscillation of cyanobacterial KaiC  
847 phosphorylation in vitro. *Science* **308**, 414-415 (2005).

848

849 2. Egli M, Mori T, Pattanayek R, Xu Y, Qin X, Johnson CH. Dephosphorylation of the Core  
850 Clock Protein KaiC in the Cyanobacterial KaiABC Circadian Oscillator Proceeds via an ATP  
851 Synthase Mechanism. *Biochemistry* **51**, 1547-1558 (2012).

852

853 3. Pattanayek R, Wang J, Mori T, Xu Y, Johnson CH, Egli M. Visualizing a Circadian Clock  
854 Protein: Crystal Structure of KaiC and Functional Insights. *Molecular Cell* **15**, 375-388  
855 (2004).

856

857 4. Terauchi K, *et al.* ATPase activity of KaiC determines the basic timing for circadian clock of  
858 cyanobacteria. *Proc Natl Acad Sci U S A* **104**, 16377-16381 (2007).

859

860 5. Kim YI, Dong G, Carruthers CW, Golden SS, LiWang A. The day/night switch in KaiC, a  
861 central oscillator component of the circadian clock of cyanobacteria. *Proc Natl Acad Sci U  
862 S A* **105**, 12825-12830 (2008).

863

864 6. Iwasaki H, Nishiwaki T, Kitayama Y, Nakajima M, Kondo T. KaiA-stimulated KaiC  
865 phosphorylation in circadian timing loops in cyanobacteria. *Proc Natl Acad Sci U S A* **99**,  
866 15788-15793 (2002).

867

868 7. Pattanayek R, Egli M. Protein–Protein Interactions in the Cyanobacterial Circadian Clock:  
869 Structure of KaiA Dimer in Complex with C-Terminal KaiC Peptides at 2.8 Å Resolution.  
870 *Biochemistry* **54**, 4575-4578 (2015).

871

872 8. Chang Y-G, Kuo N-W, Tseng R, LiWang A. Flexibility of the C-terminal, or CII, ring of KaiC  
873 governs the rhythm of the circadian clock of cyanobacteria. *Proc Natl Acad Sci U S A* **108**,  
874 14431-14436 (2011).

875

876 9. Chang Y-G, Tseng R, Kuo N-W, LiWang A. Rhythmic ring-ring stacking drives the circadian  
877 oscillator clockwise. *Proc Natl Acad Sci U S A* **109**, 16847-16851 (2012).

878

879 10. Nishiwaki T, *et al.* Role of KaiC phosphorylation in the circadian clock system of  
880 *Synechococcus elongatus* PCC 7942. *Proc Natl Acad Sci U S A* **101**, 13927-13932 (2004).

- 881  
882 11. Kitayama Y, Iwasaki H, Nishiwaki T, Kondo T. KaiB functions as an attenuator of KaiC  
883 phosphorylation in the cyanobacterial circadian clock system. *The EMBO Journal* **22**, 2127-  
884 2134 (2003).
- 885  
886 12. Tseng R, *et al.* Cooperative KaiA–KaiB–KaiC Interactions Affect KaiB/SasA Competition in  
887 the Circadian Clock of Cyanobacteria. *Journal of Molecular Biology* **426**, 389-402 (2014).
- 888  
889 13. Rust MJ, Markson JS, Lane WS, Fisher DS, O'Shea EK. Ordered phosphorylation governs  
890 oscillation of a three-protein circadian clock. *Science* **318**, 809-812 (2007).
- 891  
892 14. Cohen SE, Golden SS. Circadian Rhythms in Cyanobacteria. *Microbiology and Molecular*  
893 *Biology Reviews* **79**, 373-385 (2015).
- 894  
895 15. Swan JA, Golden SS, LiWang A, Partch CL. Structure, function, and mechanism of the core  
896 circadian clock in cyanobacteria. *Journal of Biological Chemistry* **293**, 5026-5034 (2018).
- 897  
898 16. Snijder J, Axmann IM. The Kai-Protein Clock-Keeping Track of Cyanobacteria's Daily Life.  
899 In: *Macromolecular Protein Complexes II: Structure and Function* (eds Harris JR, Marles-  
900 Wright J) (2019).
- 901  
902 17. Zhao C, Xu Y, Wang B, Johnson CH. *Synechocystis*: A model system for expanding the study  
903 of cyanobacterial circadian rhythms. *Front Physiol* **13**, 1085959 (2022).
- 904  
905 18. Schmelling NM, Scheurer N, Köbler C, Wilde A, Axmann IM. Diversity of Timing Systems in  
906 Cyanobacteria and Beyond. In: *Circadian Rhythms in Bacteria and Microbiomes* (eds  
907 Johnson CH, Rust MJ). Springer International Publishing (2021).
- 908  
909 19. Loza-Correa M, Gomez-Valero L, Buchrieser C. Circadian clock proteins in prokaryotes:  
910 Hidden rhythms? *Frontiers in Microbiology* **1**, 1-11 (2010).
- 911  
912 20. Terrettaz C, Cabete B, Geiser J, Valentini M, Gonzalez D. KaiC-like proteins contribute to  
913 stress resistance and biofilm formation in environmental *Pseudomonas* species. *Environ*  
914 *Microbiol* **25**, 894-913 (2023).
- 915  
916 21. Ma P, Mori T, Zhao C, Thiel T, Johnson CH. Evolution of KaiC-Dependent Timekeepers: A  
917 Proto-circadian Timing Mechanism Confers Adaptive Fitness in the Purple Bacterium  
918 *Rhodospirillum rubrum*. *PLoS Genet* **12**, e1005922 (2016).

- 919  
920 22. Pitsawong W, *et al.* From primordial clocks to circadian oscillators. *Nature* **616**, 183-189  
921 (2023).
- 922  
923 23. Kanesaki Y, *et al.* Identification of Substrain-Specific Mutations by Massively Parallel  
924 Whole-Genome Resequencing of *Synechocystis* sp. PCC 6803. *DNA Research* **19**, 67-79  
925 (2012).
- 926  
927 24. Aoki S, Onai K. Circadian Clocks of *Synechocystis* sp. Strain PCC 6803,  
928 *Thermosynechococcus elongatus*, *Prochlorococcus* spp., *Trichodesmium* spp. and Other  
929 Species. In: *Bacterial Circadian Programs* (eds Ditty JL, Mackey SR, Johnson CH). Springer-  
930 Verlag Berlin (2009).
- 931  
932 25. Wiegard A, *et al.* *Synechocystis* KaiC3 displays temperature- And KaiB-dependent ATPase  
933 activity and is important for growth in darkness. *J Bacteriol* **202**, 1-36 (2020).
- 934  
935 26. Schmelling NM, *et al.* Minimal tool set for a prokaryotic circadian clock. *BMC Evolutionary*  
936 *Biology* **17**, 169 (2017).
- 937  
938 27. Wiegard A, *et al.* Biochemical analysis of three putative KaiC clock proteins from  
939 *Synechocystis* sp. PCC 6803 suggests their functional divergence. *Microbiology* **159**, 948-  
940 958 (2013).
- 941  
942 28. Trautmann D, Voß B, Wilde A, Al-Babili S, Hess WR. Microevolution in cyanobacteria: Re-  
943 sequencing a motile substrain of *Synechocystis* sp. PCC 6803. *DNA Research* **19**, 435-448  
944 (2012).
- 945  
946 29. Dörrich AK, Mitschke J, Siadat O, Wilde A. Deletion of the *Synechocystis* sp. PCC 6803  
947 *kaiAB1C1* gene cluster causes impaired cell growth under light-dark conditions.  
948 *Microbiology* **160**, 2538-2550 (2014).
- 949  
950 30. Axmann IM, *et al.* Biochemical evidence for a timing mechanism in *Prochlorococcus*. *J*  
951 *Bacteriol* **191**, 5342-5347 (2009).
- 952  
953 31. Holtzendorff J, Partensky F, Mella D, Lennon JF, Hess WR, Garczarek L. Genome  
954 streamlining results in loss of robustness of the circadian clock in the marine  
955 cyanobacterium *Prochlorococcus marinus* PCC 9511. *J Biol Rhythms* **23**, 187-199 (2008).
- 956

- 957 32. Williams SB, Vakonakis I, Golden SS, LiWang AC. Structure and function from the circadian  
958 clock protein KaiA of *Synechococcus elongatus*: a potential clock input mechanism. *Proc*  
959 *Natl Acad Sci U S A* **99**, 15357-15362 (2002).
- 960  
961 33. Vakonakis I, Sun J, Wu T, Holzenburg A, Golden SS, LiWang AC. NMR structure of the KaiC-  
962 interacting C-terminal domain of KaiA, a circadian clock protein: implications for KaiA-KaiC  
963 interaction. *Proc Natl Acad Sci U S A* **101**, 1479-1484 (2004).
- 964  
965 34. Ye S, Vakonakis I, Ioerger TR, LiWang AC, Sacchettini JC. Crystal structure of circadian clock  
966 protein KaiA from *Synechococcus elongatus*. *Journal of Biological Chemistry* **279**, 20511-  
967 20518 (2004).
- 968  
969 35. Kim YI, Vinyard DJ, Ananyev GM, Dismukes GC, Golden SS. Oxidized quinones signal onset  
970 of darkness directly to the cyanobacterial circadian oscillator. *Proc Natl Acad Sci U S A*  
971 **109**, 17765-17769 (2012).
- 972  
973 36. Nishimura H, *et al.* Mutations in KaiA, a clock protein, extend the period of circadian  
974 rhythm in the cyanobacterium *Synechococcus elongatus* PCC 7942. *Microbiology* **148**,  
975 2903-2909 (2002).
- 976  
977 37. Köbler C, Schultz SJ, Kopp D, Voigt K, Wilde A. The role of the *Synechocystis* sp. PCC 6803  
978 homolog of the circadian clock output regulator RpaA in day–night transitions. *Molecular*  
979 *Microbiology* **110**, 847-861 (2018).
- 980  
981 38. Sato SS, Shimoda Y, Muraki A, Kohara M, Nakamura Y, Tabata S. A large-scale protein  
982 protein interaction analysis in *Synechocystis* sp. PCC 6803. *DNA Research* **14**, 207-216  
983 (2007).
- 984  
985 39. Baikalov I, Schröder I, Kaczor-Grzeskowiak M, Grzeskowiak K, Gunsalus RP, Dickerson RE.  
986 Structure of the *Escherichia coli* response regulator NarL. *Biochemistry* **35**, 11053-11061  
987 (1996).
- 988  
989 40. Komarek J, Kaštovský J, Mares J, Johansen J. Taxonomic classification of cyanoprokaryotes  
990 (cyanobacterial genera) 2014, using a polyphasic approach. *Preslia* **86**, 295-335 (2014).
- 991  
992 41. Galperin MY. Structural classification of bacterial response regulators: Diversity of output  
993 domains and domain combinations. *J Bacteriol* **188**, 4169-4182 (2006).

994



- 995 42. Dvornyk V, Mei Q. Evolution of *kaiA*, a key circadian gene of cyanobacteria. *Scientific*  
996 *Reports* **11**, 9995 (2021).
- 997
- 998 43. Ashby MK, Houmard J. Cyanobacterial Two-Component Proteins: Structure, Diversity,  
999 Distribution, and Evolution. *Microbiology and Molecular Biology Reviews* **70**, 472-509  
1000 (2006).
- 1001
- 1002 44. Vakonakis I, LiWang AC. Structure of the C-terminal domain of the clock protein KaiA in  
1003 complex with a KaiC-derived peptide: implications for KaiC regulation. *Proc Natl Acad Sci*  
1004 *U S A* **101**, 10925-10930 (2004).
- 1005
- 1006 45. Delumeau O, *et al.* Functional and structural characterization of RsbU, a stress signaling  
1007 protein phosphatase 2C. *Journal of Biological Chemistry* **279**, 40927-40937 (2004).
- 1008
- 1009 46. Iwasaki H, Taniguchi Y, Ishiura M, Kondo T. Physical interactions among circadian clock  
1010 proteins KaiA, KaiB and KaiC in cyanobacteria. *The EMBO Journal* **18**, 1137-1145 (1999).
- 1011
- 1012 47. Clodong S, *et al.* Functioning and robustness of a bacterial circadian clock. *Molecular*  
1013 *Systems Biology* **3**, 90 (2007).
- 1014
- 1015 48. Nakajima M, Ito H, Kondo T. In vitro regulation of circadian phosphorylation rhythm of  
1016 cyanobacterial clock protein KaiC by KaiA and KaiB. *FEBS Letters* **584**, 898-902 (2010).
- 1017
- 1018 49. Lin J, Chew J, Chockanathan U, Rust MJ. Mixtures of opposing phosphorylations within  
1019 hexamers precisely time feedback in the cyanobacterial circadian clock. *Proc Natl Acad*  
1020 *Sci U S A* **111**, E3937-E3945 (2014).
- 1021
- 1022 50. Dvornyk V, Vinogradova O, Nevo E. Origin and evolution of circadian clock genes in  
1023 prokaryotes. *Proc Natl Acad Sci U S A* **100**, 2495-2500 (2003).
- 1024
- 1025 51. Loza-Correa M, *et al.* The *Legionella pneumophila* kai operon is implicated in stress  
1026 response and confers fitness in competitive environments. *Environ Microbiol* **16**, 359-381  
1027 (2014).
- 1028
- 1029 52. Min H, Guo H, Xiong J. Rhythmic gene expression in a purple photosynthetic bacterium,  
1030 *Rhodobacter sphaeroides*. *FEBS Letters* **579**, 808-812 (2005).
- 1031

- 1032 53. de Sousa Machado JN, *et al.* Autophosphorylation of the KaiC-like protein ArlH inhibits  
1033 oligomerization and interaction with Arll, the motor ATPase of the archaellum. *Molecular*  
1034 *Microbiology* **116**, 943-956 (2021).
- 1035
- 1036 54. Dong P, *et al.* A dynamic interaction process between KaiA and KaiC is critical to the  
1037 cyanobacterial circadian oscillator. *Scientific Reports* **6**, 25129 (2016).
- 1038
- 1039 55. Mori T, *et al.* Circadian clock protein KaiC forms ATP-dependent hexameric rings and binds  
1040 DNA. *Proc Natl Acad Sci U S A* **99**, 17203-17208 (2002).
- 1041
- 1042 56. Yang X, Kang CM, Brody MS, Price CW. Opposing pairs of serine protein kinases and  
1043 phosphatases transmit signals of environmental stress to activate a bacterial transcription  
1044 factor. *Genes and Development* **10**, 2265-2275 (1996).
- 1045
- 1046 57. Eelderink-Chen Z, Bosman J, Sartor F, Dodd AN, Kovács ÁT, Meroow M. A circadian clock  
1047 in a nonphotosynthetic prokaryote. *Science Advances* **7**, eabe2086 (2021).
- 1048
- 1049 58. Paulose JK, Wright JM, Patel AG, Cassone VM. Human Gut Bacteria Are Sensitive to  
1050 Melatonin and Express Endogenous Circadian Rhythmicity. *PLoS One* **11**, e0146643  
1051 (2016).
- 1052
- 1053 59. Schmitz O, Katayama M, Williams SB, Kondo T, Golden SS. CikA, a Bacteriophytochrome  
1054 That Resets the Cyanobacterial Circadian Clock. *Science* **289**, 765-768 (2000).
- 1055
- 1056 60. Pattanayak Gopal K, Phong C, Rust Michael J. Rhythms in Energy Storage Control the  
1057 Ability of the Cyanobacterial Circadian Clock to Reset. *Current Biology* **24**, 1934-1938  
1058 (2014).
- 1059
- 1060 61. Ivleva NB, Gao T, Liwang AC, Golden SS. Quinone sensing by the circadian input kinase of  
1061 the cyanobacterial circadian clock. *Proc Natl Acad Sci U S A* **103**, 17468-17473 (2006).
- 1062
- 1063 62. Kim P, *et al.* CikA, an Input Pathway Component, Senses the Oxidized Quinone Signal to  
1064 Generate Phase Delays in the Cyanobacterial Circadian Clock. *J Biol Rhythms* **35**, 227-234  
1065 (2020).
- 1066
- 1067 63. Pattanayak Gopal K, Lambert G, Bernat K, Rust Michael J. Controlling the Cyanobacterial  
1068 Clock by Synthetically Rewiring Metabolism. *Cell Reports* **13**, 2362-2367 (2015).
- 1069

- 1070 64. Haydon MJ, Mielczarek O, Robertson FC, Hubbard KE, Webb AAR. Photosynthetic  
1071 entrainment of the *Arabidopsis thaliana* circadian clock. *Nature* **502**, 689-692 (2013).
- 1072  
1073 65. Anderson SL, McIntosh L. Light-activated heterotrophic growth of the cyanobacterium  
1074 *Synechocystis* sp. strain PCC 6803: A blue-light-requiring process. *J Bacteriol* **173**, 2761-  
1075 2767 (1991).
- 1076  
1077 66. Narikawa R, Kohchi T, Ikeuchi M. Characterization of the photoactive GAF domain of the  
1078 CikA homolog (SyCikA, Slr1969) of the cyanobacterium *Synechocystis* sp. PCC 6803.  
1079 *Photochemical and Photobiological Sciences* **7**, 1253-1259 (2008).
- 1080  
1081 67. Welkie DG, *et al.* Genome-wide fitness assessment during diurnal growth reveals an  
1082 expanded role of the cyanobacterial circadian clock protein KaiA. *Proc Natl Acad Sci U S A*  
1083 **115**, E7174-E7183 (2018).
- 1084  
1085 68. Xu Y, Mori T, Johnson CH. Cyanobacterial circadian clockwork: roles of KaiA, KaiB and the  
1086 kaiBC promoter in regulating KaiC. *The EMBO Journal* **22**, 2117-2126 (2003).
- 1087  
1088 69. Xu Y, *et al.* Circadian Yin-Yang Regulation and Its Manipulation to Globally Reprogram  
1089 Gene Expression. *Current Biology* **23**, 2365-2374 (2013).
- 1090  
1091 70. Singh AK, Sherman LA. Pleiotropic effect of a histidine kinase on carbohydrate metabolism  
1092 in *Synechocystis* sp. strain PCC 6803 and its requirement for heterotrophic growth. *J*  
1093 *Bacteriol* **187**, 2368-2376 (2005).
- 1094  
1095 71. Scheurer NM, *et al.* Homologs of Circadian Clock Proteins Impact the Metabolic Switch  
1096 Between Light and Dark Growth in the Cyanobacterium *Synechocystis* sp. PCC 6803.  
1097 *Frontiers in Plant Science* **12**, 675227 (2021).
- 1098  
1099 72. Tichý M, Bečková M, Kopečná J, Noda J, Sobotka R, Komenda J. Strain of *Synechocystis*  
1100 PCC 6803 with Aberrant Assembly of Photosystem II Contains Tandem Duplication of a  
1101 Large Chromosomal Region. *Front Plant Sci* **7**, 648 (2016).
- 1102  
1103 73. Fisher RA. On the Interpretation of  $\chi^2$  from Contingency Tables, and the Calculation of P.  
1104 *Journal of the Royal Statistical Society* **85**, 87-94 (1922).
- 1105  
1106 74. Benjamini Y, Hochberg Y. Controlling the False Discovery Rate: A Practical and Powerful  
1107 Approach to Multiple Testing. *Journal of the Royal Statistical Society: Series B*  
1108 *(Methodological)* **57**, 289-300 (1995).

- 1109  
1110 75. Oberto J. SyntTax: A web server linking synteny to prokaryotic taxonomy. *BMC*  
1111 *Bioinformatics* **14**, (2013).
- 1112  
1113 76. Waterhouse AM, Procter JB, Martin DMA, Clamp M, Barton GJ. Jalview Version 2-A  
1114 multiple sequence alignment editor and analysis workbench. *Bioinformatics* **25**, 1189-  
1115 1191 (2009).
- 1116  
1117 77. Katoh K, Standley DM. MAFFT multiple sequence alignment software version 7:  
1118 Improvements in performance and usability. *Molecular Biology and Evolution* **30**, 772-780  
1119 (2013).
- 1120  
1121 78. Gabler F, *et al.* Protein Sequence Analysis Using the MPI Bioinformatics Toolkit. *Curr*  
1122 *Protoc Bioinformatics* **72**, e108 (2020).
- 1123  
1124 79. Kelley LA, Mezulis S, Yates CM, Wass MN, Sternberg MJE. The Phyre2 web portal for  
1125 protein modeling, prediction and analysis. *Nature Protocols* **10**, 845-858 (2015).
- 1126  
1127 80. Waterhouse A, *et al.* SWISS-MODEL: homology modelling of protein structures and  
1128 complexes. *Nucleic Acids Research* **46**, (2018).
- 1129  
1130 81. Pettersen EF, *et al.* UCSF Chimera - A visualization system for exploratory research and  
1131 analysis. *Journal of Computational Chemistry* **25**, 1605-1612 (2004).
- 1132  
1133 82. Kumar S, Stecher G, Li M, Knyaz C, Tamura K. MEGA X: Molecular evolutionary genetics  
1134 analysis across computing platforms. *Molecular Biology and Evolution* **35**, 1547-1549  
1135 (2018).
- 1136  
1137 83. Stecher G, Tamura K, Kumar S. Molecular Evolutionary Genetics Analysis (MEGA) for  
1138 macOS. *Molecular Biology and Evolution* **37**, 1237-1239 (2020).
- 1139  
1140 84. Nishiwaki T, *et al.* A sequential program of dual phosphorylation of KaiC as a basis for  
1141 circadian rhythm in cyanobacteria. *The EMBO Journal* **26**, 4029-4037 (2007).
- 1142  
1143 85. Schagger H, von Jagow G. Tricine-sodium dodecyl sulfate-polyacrylamide gel  
1144 electrophoresis for the separation of proteins in the range from 1 to 100 kDa. *Analytical*  
1145 *Biochemistry* **166**, 368-379 (1987).
- 1146

- 1147 86. Laemmli UK. Cleavage of Structural Proteins during the Assembly of the Head of  
1148 Bacteriophage T4. *Nature* **227**, 680-685 (1970).
- 1149  
1150 87. Shevchenko A, Tomas H, Havliš J, Olsen JV, Mann M. In-gel digestion for mass  
1151 spectrometric characterization of proteins and proteomes. *Nature Protocols* **1**, 2856-2860  
1152 (2007).
- 1153  
1154 88. Rappsilber J, Mann M, Ishihama Y. Protocol for micro-purification, enrichment, pre-  
1155 fractionation and storage of peptides for proteomics using StageTips. *Nature Protocols* **2**,  
1156 1896-1906 (2007).
- 1157  
1158 89. Cox J, Hein MY, Luber CA, Paron I, Nagaraj N, Mann M. Accurate proteome-wide label-  
1159 free quantification by delayed normalization and maximal peptide ratio extraction,  
1160 termed MaxLFQ. *Molecular & Cellular Proteomics* **13**, 2513-2526 (2014).
- 1161  
1162 90. Rippka R, Deruelles J, Herdman M, Waterbury JB, Stanier RY. Generic Assignments, Strain  
1163 Histories and Properties of Pure Cultures of Cyanobacteria. *Microbiology* **111**, 1-61 (1979).
- 1164  
1165 91. Perez-Riverol Y, *et al.* The PRIDE database and related tools and resources in 2019:  
1166 improving support for quantification data. *Nucleic Acids Research* **47**, D442-D450 (2019).
- 1167  
1168



1 **Supplementary Information for**

2

3 **Two circadian oscillators in one cyanobacterium**

4

5 Christin Köbler<sup>a,1</sup>, Nicolas M. Schmelling<sup>b,1</sup>, Alice Pawlowski<sup>b,1</sup>, Philipp Spät<sup>c</sup>, Nina M. Scheurer<sup>a</sup>,  
6 Kim Sebastian<sup>a</sup>, Lutz Berwanger<sup>b</sup>, Boris Maček<sup>c</sup>, Ilka M. Axmann<sup>b</sup>, Anika Wiegard<sup>b</sup>, Annegret  
7 Wilde<sup>a,\*</sup>

8 <sup>a</sup>Institute of Biology III, Faculty of Biology, University of Freiburg, 79104 Freiburg, Germany;

9 <sup>b</sup>Institute for Synthetic Microbiology, Biology Department, Heinrich Heine University Düsseldorf,  
10 40225 Düsseldorf, Germany; <sup>c</sup>Department of Quantitative Proteomics, Interfaculty Institute for  
11 Cell Biology, Eberhard Karls University Tübingen, 72076 Tübingen, Germany

12 <sup>1</sup>C.K., N.M.S and A.P. contributed equally to this work.

13 \*Prof. Dr. Annegret Wilde, Albert-Ludwigs-Universität Freiburg, Institut für Biologie III,  
14 Schänzlestr. 1, 79104 Freiburg, Germany, Phone: +49 (0) 761-20397828

15 **Email:** [annegret.wilde@biologie.uni-freiburg.de](mailto:annegret.wilde@biologie.uni-freiburg.de)

16

17

18 **This PDF file includes:**

19

20 Figures S1 to S10

21

Table S1

22

23 **Other supplementary materials for this manuscript include the following:**

24

25 Datasets S1 to S3 (online only under the following link):

26

[https://supplements.biologie.uni-freiburg.de/the\\_non-standard\\_kaia3\\_regulator/](https://supplements.biologie.uni-freiburg.de/the_non-standard_kaia3_regulator/)

27

Information for reviewers: account: pilus, password: freecastle

28

29

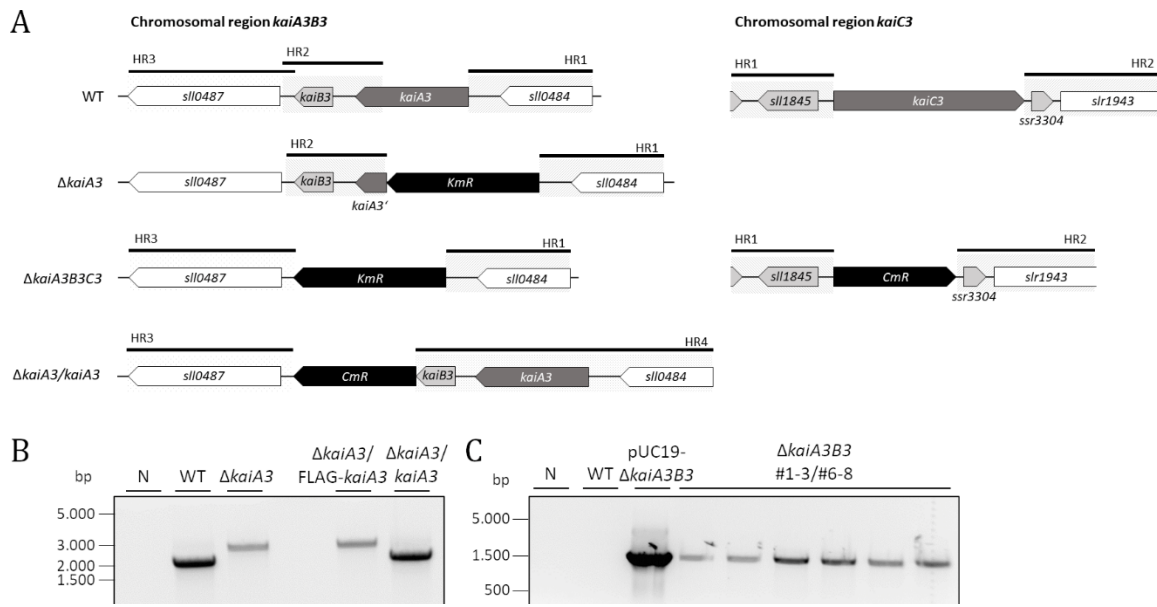

30  
31  
32  
33  
34  
35  
36  
37  
38  
39  
40  
41  
42  
43  
44  
45  
46  
47  
48  
49  
50  
51

**Fig. S1.** Construction of mutants of the KaiC3 based clock system. (A) Schematic depiction of the *kaiA3B3* and *kaiC3* genomic context. Gene locus of *kaiA3B3* with the up- and downstream located genes. *KaiA3* and *kaiB3* are transcribed as an operon together with *sll0484*, the putative promoter is upstream of *sll0484*. For the inactivation of *kaiA3*, the gene was replaced by a kanamycin resistance cassette (*KmR*). For the construction of the triple knockout mutant  $\Delta$ *kaiA3B3C3*, the genomic region from *kaiA3* to *kaiB3* was replaced by a kanamycin resistance cassette (*KmR*) in the  $\Delta$ *kaiC3* strain. Complementation of the  $\Delta$ *kaiA3* strain was achieved by the introduction of *kaiA3* within its original genomic context with a chloramphenicol resistance cassette introduced downstream of the *kaiB3* gene. Clones were selected for chloramphenicol resistance and lack of kanamycin resistance. Black bars and grey, dashed boxes represent the regions for homologous recombination into the *Synechocystis* chromosome. (B) Representative result for the verification of the complete segregation of the  $\Delta$ *kaiA3* deletion strain and  $\Delta$ *kaiA3/kaiA3* complementation strain using colony PCR with the oligonucleotides P15-P29 (Table S1A). A non-template reaction (N), chromosomal WT DNA and  $\Delta$ *kaiA3*/FLAG-*kaiA3* served as control reactions. Expected construct sizes are 1913 bp for the WT allele and  $\Delta$ *kaiA3/kaiA3*, and 2472 bp for  $\Delta$ *kaiA3* and  $\Delta$ *kaiA3*/FLAG-*kaiA3*. (C) Verification of the *kaiA3B3* deletion in the  $\Delta$ *kaiC3* strain using colony PCR with the oligonucleotides P15-P30. A non-template reaction (N), chromosomal WT DNA and the vector pUC19- $\Delta$ *kaiA3B3* served as control reactions. Expected construct size for  $\Delta$ *kaiA3B3* and pUC19- $\Delta$ *kaiA3B3* is 1554 bp. No construct was expected for the WT allele. Complete segregation was verified with the oligonucleotides P19-P30 (not shown).

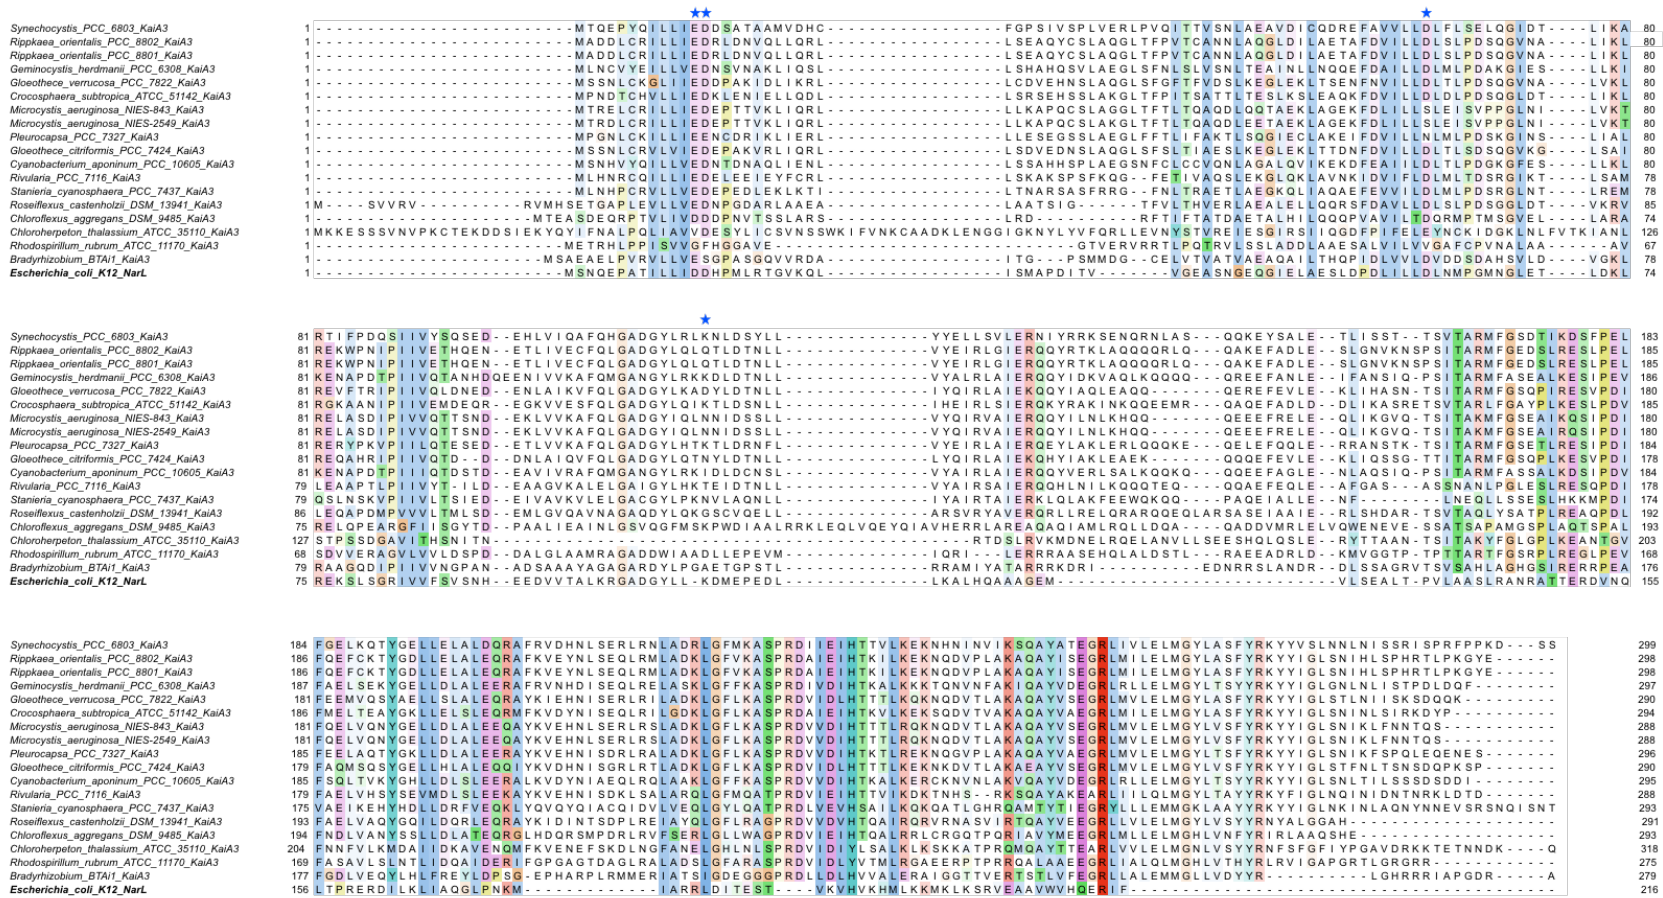

52

53 **Fig. S2.** Alignment of the amino acid sequences of SII0485 (KaiA3) orthologs including NarL from *E. coli*. The sequences were aligned with Mafft  
 54 (preset, L-INS-i). (A) Sequences are represented in the Clustalx color code with conservation visibility set 20 %<sup>1,2,3</sup>. As a representative of NarL-  
 55 type response regulators, the NarL homolog of the *E. coli* strain K12 (UniProtKB - P0AF28) was added. The residues crucial for phosphorylation in  
 56 response regulators are marked with a blue star<sup>4</sup>.

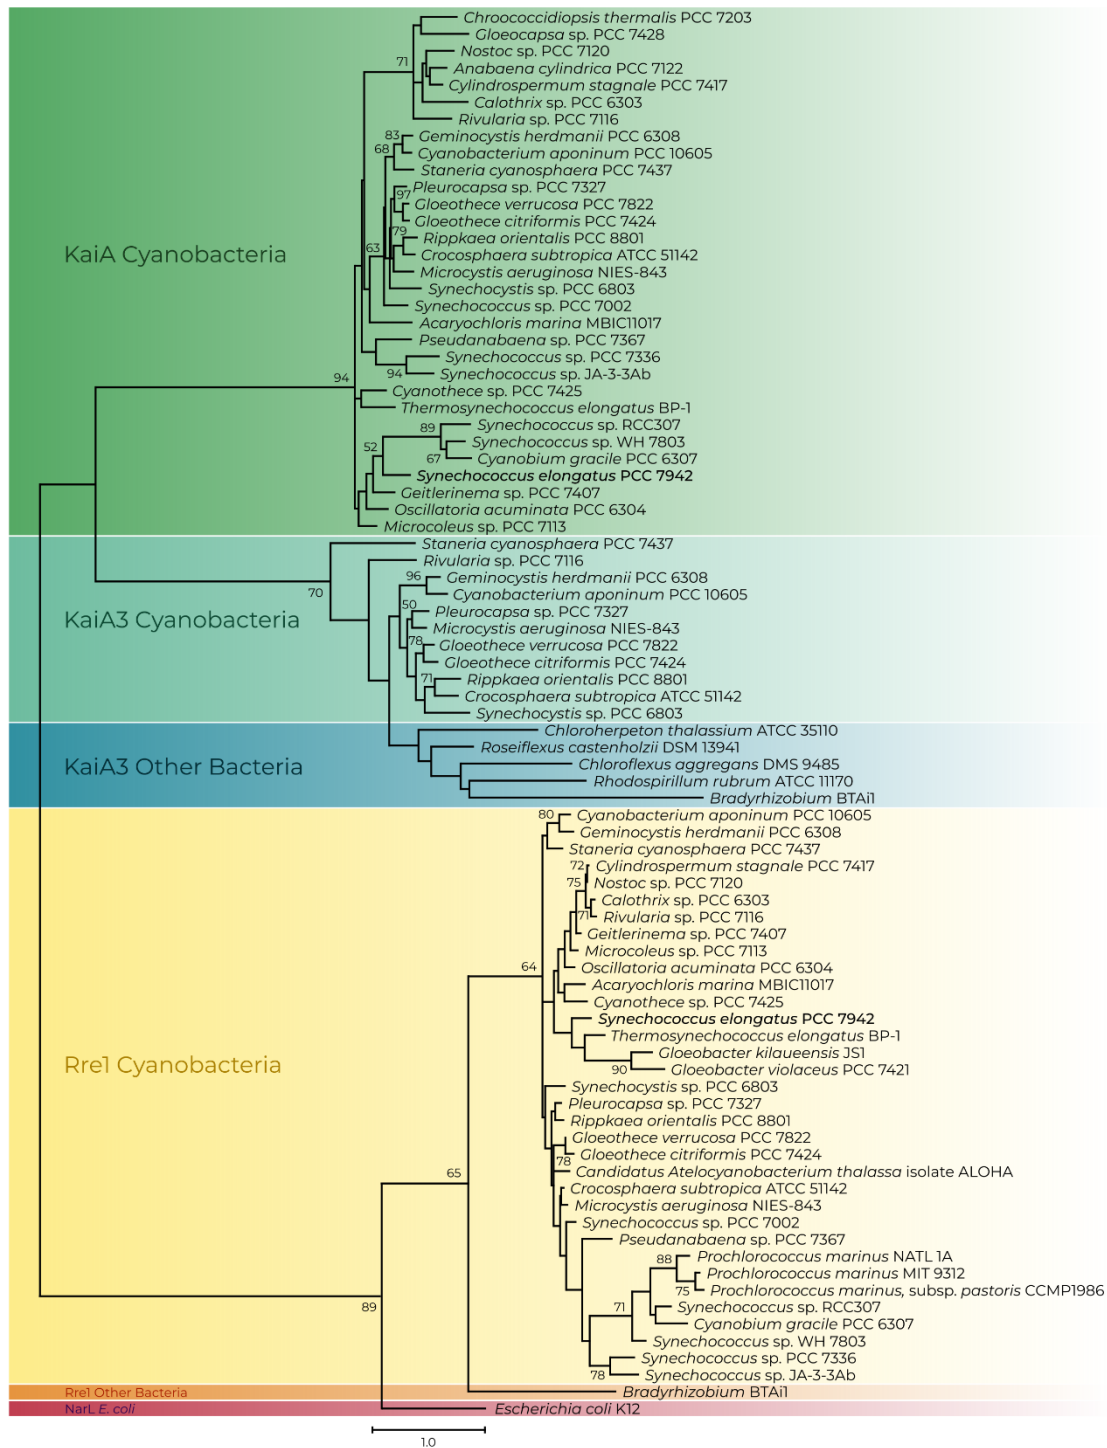

57  
58  
59  
60  
61  
62  
63  
64

**Fig. S3.** Maximum likelihood-inferred phylogenetic reconstruction of selected orthologs of Sll0485 (KaiA3), Slr1783 (Rre1) and KaiA as well as NarL from *E. coli* (UniProtKB - P0AF28). The sequences were aligned with Mafft (L-INS-i default parameters, Jalview), trimmed to position 168 of the C-terminus of the *Synechococcus elongatus* PCC 7942 KaiA. Aligned sequences were used to infer an unrooted maximum likelihood protein tree. The scale bar indicates 1 substitution per position. Bootstrap values (n=1000) are displayed at branches. Bootstrap values less than 50 are not shown.



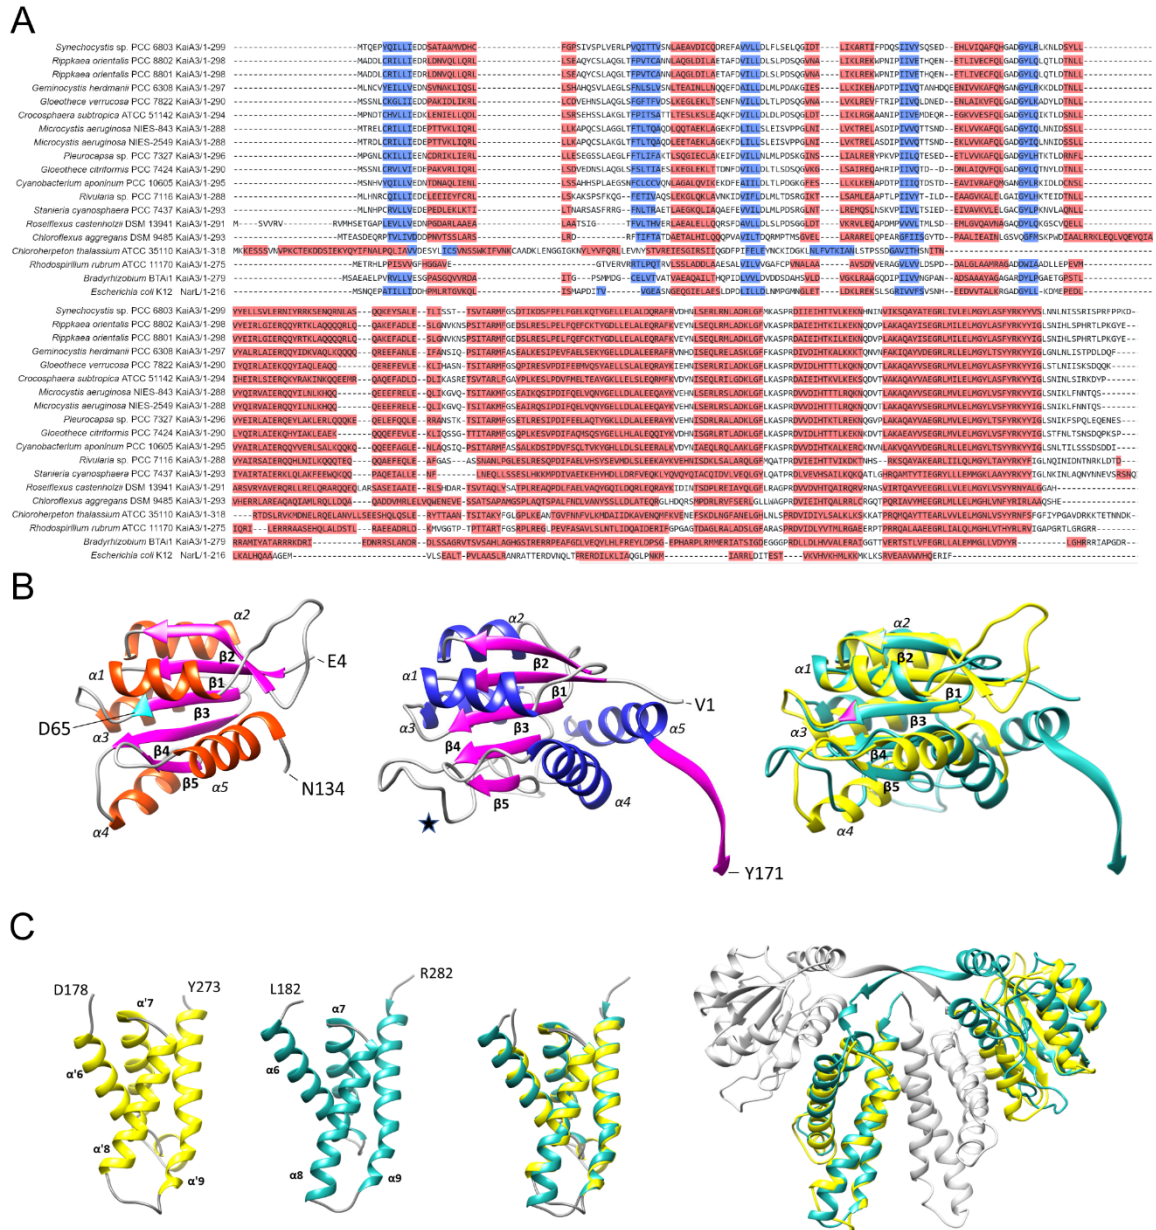

65  
66  
67  
68  
69  
70  
71  
72  
73  
74  
75  
76  
77  
78  
79  
80



81 C-terminal domain (template KaiA *Thermosynechococcus elongatus* PDB 1V2Z) was modelled  
82 with SWISS-Model (<https://swissmodel.expasy.org/>). It comprises residues D178 – Y273 (initial  
83 search with residues 141- 299) and displays a KaiA-like four helix bundle ( $\alpha'6$  -  $\alpha'9$ ). Left (light sea  
84 green): The C-terminal domain of *Synechococcus elongatus* PCC 7942 KaiA (template PDB 4G86,  
85 residues 182 - 282). Numbering of the helices according to Ye *et al.*<sup>4</sup>. Middle: Superimposition of  
86 the KaiA3 C-terminal domain model structure on the KaiA C-terminus. Right: Superimposition of  
87 both KaiA3 domains on the chain B of the KaiA dimer (PDB 4G86). KaiA3 structures are shown in  
88 yellow, KaiA structures in light sea green.

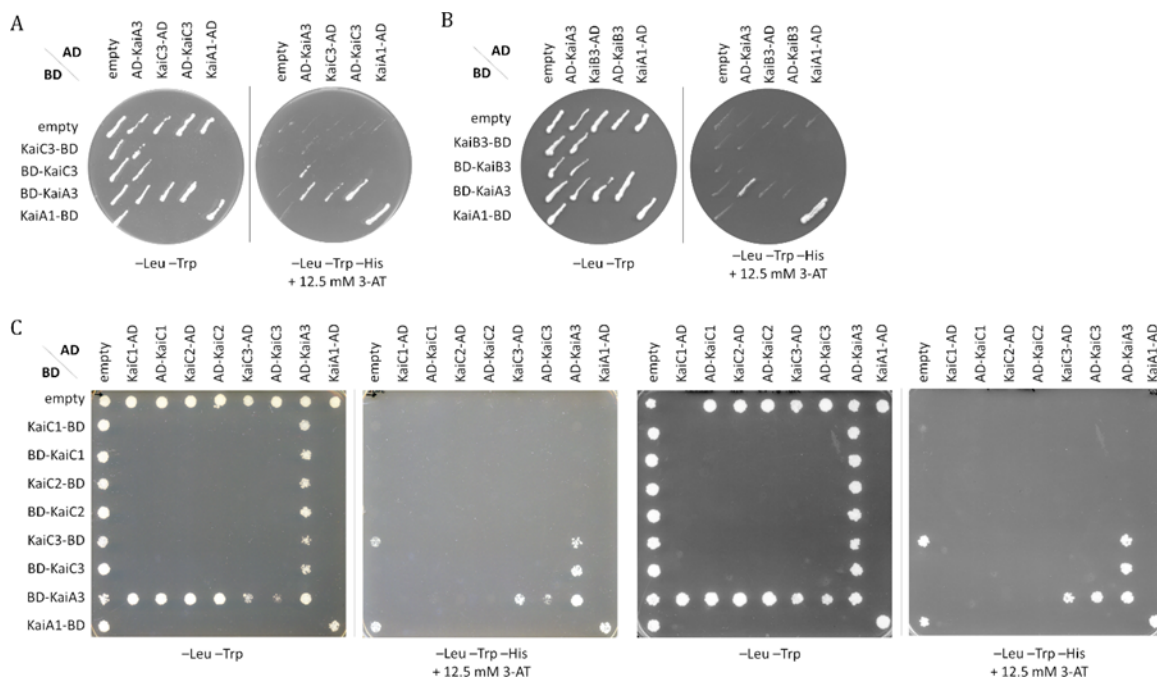

89

90 **Fig. S5.** Complete scans of the plates for KaiA3 interaction analysis with KaiB3 and the three KaiC  
 91 homologs (KaiC1-KaiC3). Yeast two-hybrid reporter strains carrying the respective bait and prey  
 92 plasmids, were selected by plating on complete supplement medium (CSM) lacking leucine and  
 93 tryptophan (-Leu -Trp). As a positive control, *Synechocystis* KaiA dimer interaction was used. AD,  
 94 GAL4 activation domain; BD, GAL4 DNA-binding domain. (A-C) Physical interaction between bait  
 95 and prey fusion proteins is determined by growth on complete medium lacking leucine, tryptophan  
 96 and histidine (-Leu -Trp -His) and addition of 12.5 mM 3-amino-1,2,4-triazole 88 (3-AT).

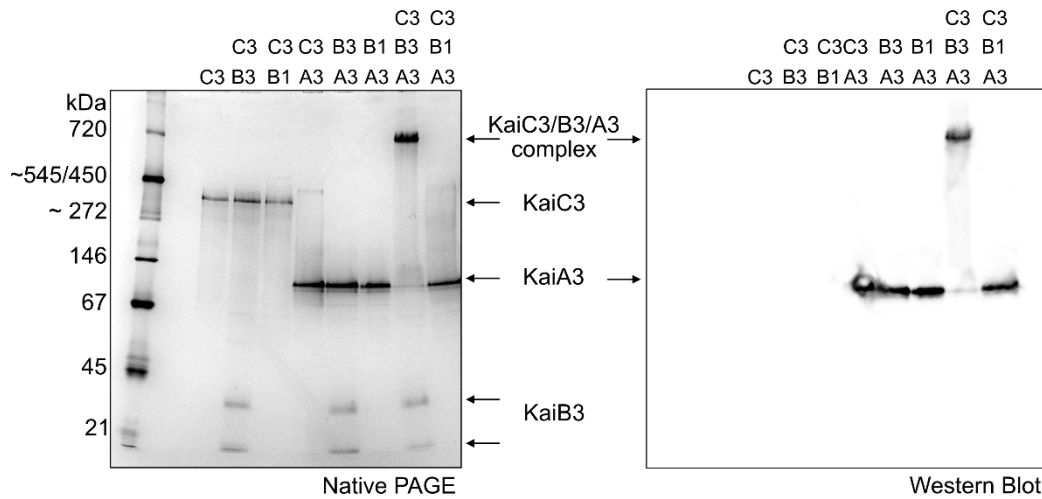

97  
98  
99  
100  
101  
102  
103  
104  
105  
106  
107

**Fig. S6.** KaiB1 does not form a complex with KaiA3 and KaiC3. Proteins were incubated for 16 h at 30 °C and subsequently subjected to 4-16% clear native PAGE. Gels were either stained with Coomassie Blue (left) or blotted and immunodecorated with a monoclonal anti-His antibody for the detection of recombinant KaiA3-His6 (right). Arrows indicate monomers or protein complexes. The KaiB1 monomer (12 kDa) is not visible in the 4-16% native gradient gel. In contrast to Fig. 2B, a faint band appears in the KaiA3/KaiC3 sample, which is shifted in comparison to the other KaiC3 bands (left). However, KaiA3 is not immunodetected in the shifted band (right).

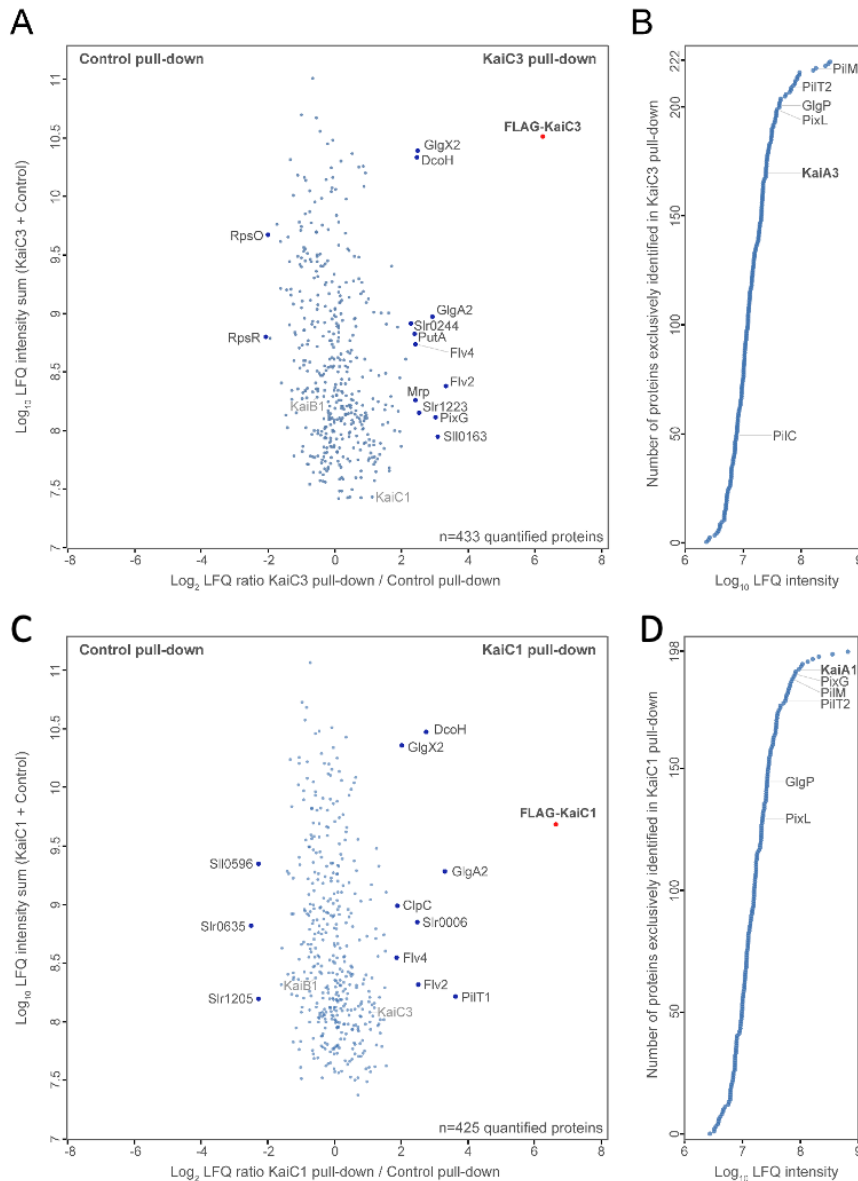

108  
 109  
 110  
 111  
 112  
 113  
 114  
 115  
 116  
 117  
 118  
 119  
 120  
 121  
 122  
 123  
 124

**Fig. S7.** Immunoprecipitation-coupled LC-MS/MS screening of KaiC3 (A, B) and KaiC1 (C, D) binding partners. Solubilized cell lysate of WT/FLAG-*kaiC3* (A), WT/FLAG-*kaiC1* (C) and WT/FLAG-*sfGFP* (control) strains were cultured under continuous light conditions in copper-depleted BG11 medium and used for  $\alpha$ -FLAG co-immunoprecipitation in pull-down assays. After FLAG-purification, the elution fractions were analyzed by LC-MS/MS. Label-free quantification using the MaxQuant MaxLFQ algorithm was applied to identify co-enriched proteins. Panels A, C include quantified proteins which were detected in the FLAG-KaiC3 or FLAG-KaiC1 overexpression strain and the control strain. Log<sub>2</sub> LFQ ratios of FLAG-KaiC / control are plotted against the log<sub>10</sub> LFQ intensity. Significantly enriched proteins ( $p$ -value = 0.01), labeled in dark grey font, are potential interaction partners of KaiC3 or KaiC1. (B, D) Panels include proteins which were exclusively identified in the FLAG-KaiC3 (B) or KaiC1 (D) pull-down, but not in the control. Proteins were sorted by their abundance in the KaiC co-immunoprecipitation eluates and selected proteins were labeled. A full list of identified proteins is shown in Data S2.

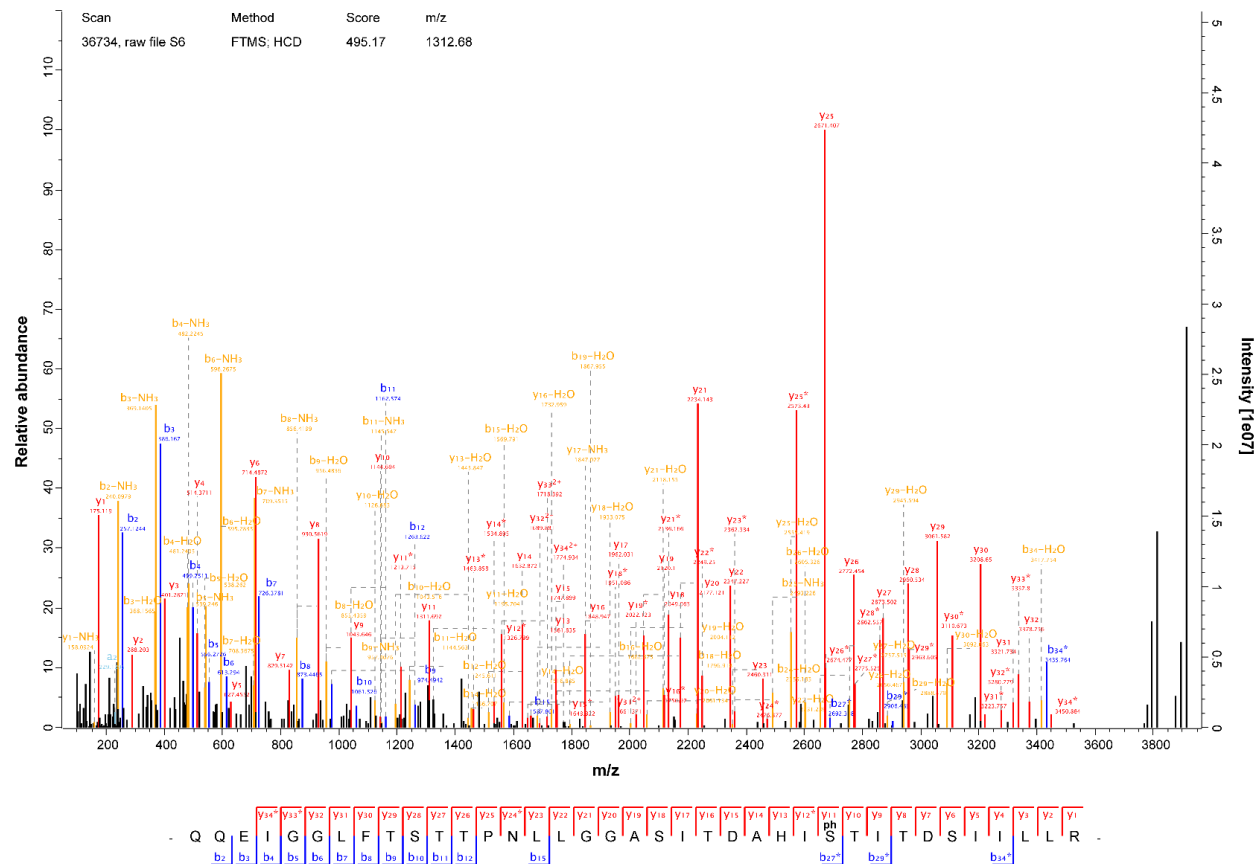

125

126 **Fig. S8.** Representative phosphopeptide of KaiC3 detected by mass spectrometry. Samples from  
 127 KaiC3-KaiA3 *in vitro* co-incubation assays (see materials and method KaiC3 phosphorylation in *in*  
 128 *vitro* assays and liquid chromatography mass spectrometry (LC-MS/MS)) were digested with trypsin  
 129 and analyzed by LC-MS/MS analysis. Comprehensive b- and y-ion series of an abundant, singly  
 130 phosphorylated 37 amino acid peptide could be detected, localizing the phosphorylation site on  
 131 Ser423 (position 27 in the peptide). In multiple cases, phosphorylation could be localized on the  
 132 neighboring Thr424 position instead. Both sites are homologous positions to the KaiC1 auto-  
 133 phosphorylation sites Ser432 and Thr433 and appeared with increased abundance after prolonged  
 134 KaiC3-KaiA3 co-incubation duration.



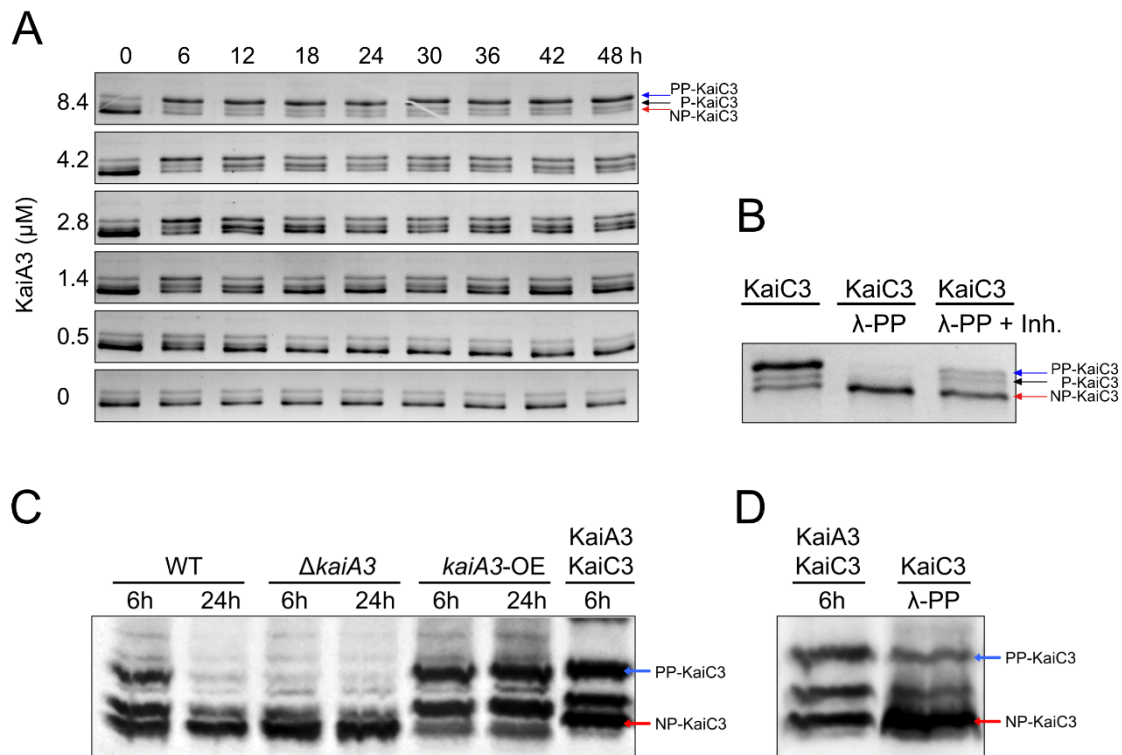

135  
136  
137  
138  
139  
140  
141  
142  
143  
144  
145  
146  
147  
148  
149  
150  
151  
152  
153

**Fig. S9:** In vitro and in vivo phosphorylation of KaiC3 in dependence of KaiA3. (A) In vitro phosphorylation of KaiC3 in the presence of 7.4  $\mu$ M KaiB3 and varying concentrations of KaiA3. Representative gel images from 1 assay used for quantification of PP-KaiC3/total KaiC3 displayed in Fig. 3A. (B) KaiC3 was dephosphorylated by incubation with Lambda phosphatase (KaiC3/ $\lambda$ -PP) for 18h at 30°C and separated via high-resolution LowC SDS-PAGE as in A. As control, Lambda-phosphatase activity was blocked by addition of PhosSTOP (Roche) and 10 mM vanadate (KaiC3/ $\lambda$ -PP +Inh.). (C) Comparison of in vivo and in vitro phosphorylation of KaiC3. Whole cell extracts of *Synechocystis* wild-type (WT), *kaiA3* mutant ( $\Delta$ *kaiA3*), and the overexpression (*kaiA3*-OE) strain, grown in a 12-h light/dark cycle, were subjected to Phos-tag SDS-PAGE followed by western blot analysis with a KaiC3-specific antibody. According to the data shown in Fig. 3C, KaiC3 is in a highly phosphorylated state at 6 h and mostly dephosphorylated at 24 h. For comparison, purified and in vitro phosphorylated KaiC3 were applied to the same gel. (D) KaiC3 was dephosphorylated (KaiC3/PP) using Lambda phosphatase (NEB), applied to a Phos-tag SDS-PAGE and Western blot analysis alongside with in vitro phosphorylated KaiC3, confirming that the fast migrating band of KaiC3 represents the dephosphorylated form of KaiC3. KaiC3 was phosphorylated in vitro in a mixture with KaiA3 (4.2  $\mu$ M) for 6 h at 30°C (KaiA3-KaiC3/6h).

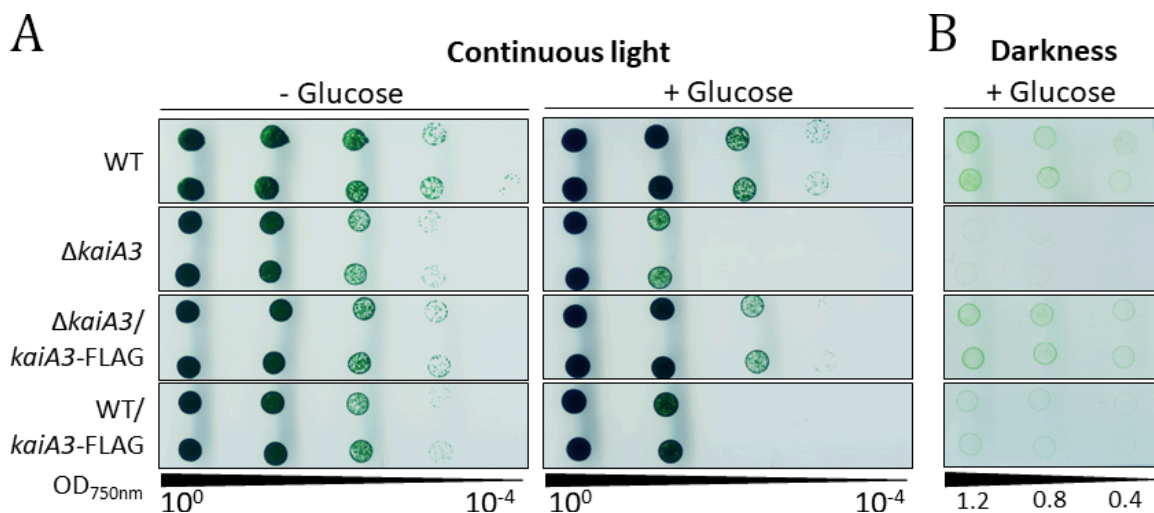

154  
155  
156  
157  
158  
159  
160  
161  
162  
163  
164  
165  
166  
167  
168  
169

**Fig. S10.** Overaccumulation of *kaiA3* results in growth defects during mixotrophic and chemoheterotrophic growth. Proliferation of the WT, the *kaiA3* deletion mutant, and the strains  $\Delta kaiA3/kaiA3\text{-FLAG}$  and WT/*kaiA3-FLAG*, expressing *kaiA3* ectopically from a self-replicating plasmid, was tested under phototrophic (continuous light, - glucose), photomixotrophic (continuous light, + glucose) and heterotrophic (darkness, + glucose) conditions. Strains were grown in liquid culture under constant light, different dilutions were spotted on agar plates and incubated in the indicated conditions with  $75 \mu\text{mol photons m}^{-2} \text{s}^{-1}$  white light (A) or in darkness (B). A representative result of three independent experiments is shown. (A) Cultures were diluted to  $\text{OD}_{750\text{nm}}$  value 0.4 and dilution series were spotted on agar plates with or without the addition of 0.2% glucose. Plates were analyzed after 6 days of continuous light. (B) Cultures were diluted to  $\text{OD}_{750\text{nm}}$  values of 1.2, 0.8 and 0.4 and spotted on agar plates supplemented with 0.2% glucose. Plates were analyzed after 26 days of darkness. For expression of the *kaiA3-FLAG* gene from the  $P_{petJ}$  promoter in the overexpressor strains, all experiments were performed in medium lacking copper.

170 **Table S1.**

171 **A. Oligonucleotides used in this study.** Restriction sites are underlined. Overlaps used for  
 172 aqua cloning are marked in bold.

| Primer                                                                | Oligonucleotide Name             | Sequence (5' – 3')                                | Purpose <sup>#</sup> |
|-----------------------------------------------------------------------|----------------------------------|---------------------------------------------------|----------------------|
| Construction of yeast two-hybrid expression vectors                   |                                  |                                                   |                      |
| P1                                                                    | BD-SII0485-fw                    | <u>TTGGATCCT</u> ACCCAGGAGCCCTACCAAATTC           | Y2H                  |
| P2                                                                    | BD-SII0485-rev                   | G <u>CACTAGTAG</u> AACTATCTTTGGGGGGAAATCG         | Y2H                  |
| P3                                                                    | SII0485-AD-fw                    | <u>TAGGATCC</u> ATGACCCAGGAGCCCTACCA              | Y2H                  |
| P4                                                                    | SII0485-AD-rev                   | GCCGCTCTAGAAGAACTATCTTTGGGGGGAAATC                | Y2H                  |
| P5                                                                    | KaiC2-AD-fw                      | <u>TAGGATCC</u> ATGACAGATAACAGCCAAAG              | Y2H                  |
| P6                                                                    | KaiC2-AD-rev                     | G <u>ACCTAGG</u> GGGGTTTTGATAAATGTG               | Y2H                  |
| P7                                                                    | AD-KaiC2-fw                      | <u>TAGGATCC</u> ATACAGATAACAGCCAAAGTCTC           | Y2H                  |
| P8                                                                    | AD-KaiC2-rev                     | G <u>ACTCGAG</u> GGGGTTTTGATAAATGTG               | Y2H                  |
| P9                                                                    | BD-KaiC2-fw                      | <u>TAGGATCC</u> AAACAGATAACAGCCAAAGTCTC           | Y2H                  |
| P10                                                                   | BD-KaiC2-rev                     | <u>TACCTAGG</u> GGGGTTTTGATAAATGTG                | Y2H                  |
| Construction of <i>E. coli</i> expression vectors                     |                                  |                                                   |                      |
| P11                                                                   | 1297_ <i>sII0485</i> _Nde_fw     | <u>AATACATATG</u> ACCCAGGAGCCCTA                  | E                    |
| P12                                                                   | 1298_ <i>sII0485</i> _Xho_rev    | TAT <u>TCTCGAG</u> AGAACTATCTTTGGGG               | E                    |
| Construction of vectors used for deletion and complementation mutants |                                  |                                                   |                      |
| P13                                                                   | pUC19- <i>sII0485</i> -fw        | G <u>CATTGCC</u> ATGGGCAAGAATTC <b>ACTGGCCGTC</b> | MU                   |
| P14                                                                   | pUC19- <i>sII0485</i> -rev       | CCCATTCTCTGGCG <b>GCAAGCTTGGCGTAATC</b>           | MU                   |
| P15                                                                   | US- <i>sII0485</i> -fw           | <b>GACGGCCAGTGAATTC</b> TTGCCCATGGCAATGC          | MU, CP               |
| P16                                                                   | US- <i>sII0485</i> -rev          | <b>GACACAACGTGGCTTTCCG</b> TAATCACGGCTAAGTTC      | MU                   |
| P17                                                                   | <i>sII0485</i> -KmR-fw           | <b>CTTAGCCGTGATTAC</b> GGAAGCCACGTTGTGTC          | MU                   |
| P18                                                                   | <i>sII0485</i> -KmR-rev          | <b>AACCTAGGCGATCGGC</b> GAGGTCTGCCTCGTGAAG        | MU                   |
| P19                                                                   | DS- <i>sII0485</i> -fw           | <b>TCACGAGGCAGACCTC</b> GCCGATCGCCTAGTT           | MU, CP               |
| P20                                                                   | DS- <i>sII0485</i> -rev          | <b>GATTACGCCAAGCTTG</b> CCGCCAGAGGAATGGG          | MU, CP               |
| P21                                                                   | US- <i>sII0485</i> -compl-rev    | <b>GTATCAACAGGGAC</b> CTTAATCCTCCGGCAAACG         | MU                   |
| P22                                                                   | CmR- <i>sII0485</i> -compl-fw    | <b>TTTGCCGGAGGATTA</b> AGTGTCCTGTTGATAC           | MU                   |
| P23                                                                   | CmR- <i>sII0485</i> -compl-rev   | <b>GCCTAGGGGATAGCG</b> GCCAGCAATAGACATAAGC        | MU                   |
| P24                                                                   | DS- <i>sII0485</i> -compl-fw     | <b>TTATGTCTATTGCTG</b> GCCGCTATCCCCTAGG           | MU                   |
| P25                                                                   | DS- <i>sII0485</i> -compl-rev    | <b>GATTACGCCAAGCTT</b> GCCTATGAGTTGCCGAGG         | MU                   |
| P26                                                                   | pUC19- <i>sII0485</i> -compl-rev | <b>CCTCGGCAACTCAT</b> AGGCAAGCTTGGCGTAATC         | MU                   |
| P27                                                                   | <i>kaiA3B3</i> -KmR-rev          | <b>GCCTAGGGGATAGCG</b> GGAGGTCTGCCTCGTGAAG        | MU                   |
| P28                                                                   | DS- <i>kaiA3B3</i> -fw           | <b>TCACGAGGCAGACCT</b> CCCGCTATCCCCTAGG           | MU                   |
| P29                                                                   | NFLAG- <i>sII0485</i> -rev       | <u>GGATCCTTA</u> AGAACTATCTTTGGGG                 | MU, CP               |
| P30                                                                   | <i>kaiB3</i> -AD-rev             | GCTCTAGAATCCTCCGGCAAACG                           | CP                   |
| P31                                                                   | Km-seq-rev                       | GTATTTTCGTCTCGCTCAGGC                             | CP                   |
| P32                                                                   | Cm-seq-leftout                   | GCTCCTGAAAATCTCGATAACTC                           | CP                   |
| P33                                                                   | Km-seg-fw                        | GCCTGAGCGAGACGAAATAC                              | CP                   |
| P34                                                                   | NFLAG- <i>sII0485</i> -fw        | <u>GAATTC</u> ACCCAGGAGCCCTAC                     | MU                   |
| P35                                                                   | pSK9-ORF-fw                      | CTCCATAATACCTTCGCGTC                              | CP                   |
| P36                                                                   | pUR-rev                          | CTTCCAGATGTATGCTCTTCTGCTC                         | CP                   |

173  
 174  
 175  
 176

<sup>#</sup> CP, colony PCR; E, expression; MU, mutagenesis; Y2H, expression in yeast cells.

177

## B. Plasmids used in this study.

| Plasmid Name                | Description                                                                                                                        | Reference                                 |
|-----------------------------|------------------------------------------------------------------------------------------------------------------------------------|-------------------------------------------|
| pCGADT7ah                   | Expression of fusion proteins with a C-terminal GAL4 <sub>(768–881)</sub> AD-tag in yeast cells, LEU2, HA epitope tag              | Rausenberger <i>et al.</i> , <sup>6</sup> |
| pGADT7ah                    | Expression of fusion proteins with an N-terminal GAL4 <sub>(768–881)</sub> AD-tag in yeast cells, LEU2, HA epitope tag             | Hiltbrunner <i>et al.</i> , <sup>7</sup>  |
| pD153                       | Expression of fusion proteins with a C-terminal GAL4 <sub>(1–147)</sub> DNA-BD-tag in yeast cells, TRP1, c-Myc epitope tag         | Shimizu-Sato <i>et al.</i> , <sup>8</sup> |
| pGBKT7                      | Expression of fusion proteins with an N-terminal GAL4 <sub>(1–147)</sub> DNA-BD-tag in yeast cells, TRP1, c-Myc epitope tag        | Clontech, Germany                         |
| pGBK-BD- <i>sII0485</i>     | Expression of <i>SII0485</i> with an N-terminal GAL4 <sub>(1–147)</sub> DNA-BD-tag in yeast cells, <i>TRP1</i> , c-Myc epitope tag | This study                                |
| pGAD-AD- <i>sII0485</i>     | Expression of <i>SII0485</i> with an N-terminal GAL4 <sub>(768–881)</sub> AD-tag in yeast cells, <i>LEU2</i> , HA epitope tag      | This study                                |
| pCGAD- <i>kaiC3</i> -AD     | Expression of KaiC3 with a C-terminal GAL4 <sub>(768–881)</sub> AD-tag in yeast cells, <i>LEU2</i> , HA epitope tag                | Wiegard <i>et al.</i> , <sup>9</sup>      |
| pGAD-AD- <i>kaiC3</i>       | Expression of KaiC3 with an N-terminal GAL4 <sub>(768–881)</sub> AD-tag in yeast cells, <i>LEU2</i> , HA epitope tag               | Wiegard <i>et al.</i> , <sup>9</sup>      |
| pD153- <i>kaiC3</i> -BD     | Expression of KaiC3 with a C-terminal GAL4 <sub>(1–147)</sub> DNA-BD-tag in yeast cells, <i>TRP1</i> , c-Myc epitope tag           | Köbler <i>et al.</i> , <sup>10</sup>      |
| pGBKT7-BD- <i>kaiC3</i>     | Expression of KaiC3 with an N-terminal GAL4 <sub>(1–147)</sub> DNA-BD-tag in yeast cells, <i>TRP1</i> , c-Myc epitope tag          | Wiegard <i>et al.</i> , <sup>9</sup>      |
| pCGAD- <i>kaiB3</i> -AD     | Expression of KaiB3 with a C-terminal GAL4 <sub>(768–881)</sub> AD-tag in yeast cells, <i>LEU2</i> , HA epitope tag                | Wiegard <i>et al.</i> , <sup>9</sup>      |
| pGAD-AD- <i>kaiB3</i>       | Expression of KaiB3 with an N-terminal GAL4 <sub>(768–881)</sub> AD-tag in yeast cells, <i>LEU2</i> , HA epitope tag               | Wiegard <i>et al.</i> , <sup>9</sup>      |
| pCGAD- <i>kaiA</i> -AD      | Expression of KaiA with a C-terminal GAL4 <sub>(768–881)</sub> AD-tag in yeast cells, <i>LEU2</i> , HA epitope tag                 | Köbler <i>et al.</i> , <sup>10</sup>      |
| pD153- <i>kaiA</i> -BD      | Expression of KaiA with a C-terminal GAL4 <sub>(1–147)</sub> DNA-BD-tag in yeast cells, <i>TRP1</i> , c-Myc epitope tag            | Köbler <i>et al.</i> , <sup>10</sup>      |
| pCGAD- <i>kaiC1</i> -AD     | Expression of KaiC1 with a C-terminal GAL4 <sub>(768–881)</sub> AD-tag in yeast cells, <i>LEU2</i> , HA epitope tag                | Köbler <i>et al.</i> , <sup>10</sup>      |
| pGAD-AD- <i>kaiC1</i>       | Expression of KaiC1 with an N-terminal GAL4 <sub>(768–881)</sub> AD-tag in yeast cells, <i>LEU2</i> , HA epitope tag               | Köbler <i>et al.</i> , <sup>10</sup>      |
| pD153- <i>kaiC1</i> -BD     | Expression of KaiC1 with a C-terminal GAL4 <sub>(1–147)</sub> DNA-BD-tag in yeast cells, <i>TRP1</i> , c-Myc epitope tag           | Köbler <i>et al.</i> , <sup>10</sup>      |
| pGBKT7-BD- <i>kaiC1</i>     | Expression of KaiC1 with an N-terminal GAL4 <sub>(1–147)</sub> DNA-BD-tag in yeast cells, <i>TRP1</i> , c-Myc epitope tag          | Wiegard <i>et al.</i> , <sup>9</sup>      |
| pCGAD- <i>kaiC2</i> -AD     | Expression of KaiC2 with a C-terminal GAL4 <sub>(768–881)</sub> AD-tag in yeast cells, <i>LEU2</i> , HA epitope tag                | This study                                |
| pGAD-AD- <i>kaiC2</i>       | Expression of KaiC2 with an N-terminal GAL4 <sub>(768–881)</sub> AD-tag in yeast cells, <i>LEU2</i> , HA epitope tag               | This study                                |
| pD153- <i>kaiC2</i> -BD     | Expression of KaiC2 with a C-terminal GAL4 <sub>(1–147)</sub> DNA-BD-tag in yeast cells, <i>TRP1</i> , c-Myc epitope tag           | Köbler <i>et al.</i> , <sup>10</sup>      |
| pGBKT7-BD- <i>kaiC2</i>     | Expression of KaiC2 with an N-terminal GAL4 <sub>(1–147)</sub> DNA-BD-tag in yeast cells, <i>TRP1</i> , c-Myc epitope tag          | This study                                |
| pET22- <i>sII0485</i> -his6 | Expression of <i>SII0485</i> with a C-terminal His6 tag in <i>E. coli</i> cells                                                    | This study                                |
| pASK- <i>kaiC3</i>          | Expression of KaiC3 with an N-terminal Strep-tag (1-11) in <i>E. coli</i> cells                                                    | Wiegard <i>et al.</i> , <sup>9</sup>      |
| pGEX- <i>kaiB3</i>          | Expression of KaiB3 with an N-terminal GST-tag (1-231) in <i>E. coli</i> cells                                                     | Wiegard <i>et al.</i> , <sup>9</sup>      |
| pGEX- <i>kaiB1</i>          | Expression of KaiB1 with an N-terminal GST-tag (1-231) in <i>E. coli</i> cells                                                     | Wiegard <i>et al.</i> , <sup>9</sup>      |
| pGEX- <i>kaiA7942</i>       | Expression of KaiA from <i>Synechococcus elongatus</i> PCC 7942 with an N-terminal GST-tag (1-231) in <i>E. coli</i> cells         | Nishiwaki <i>et al.</i> , <sup>11</sup>   |

|                                |                                                                                                                                   |                                         |
|--------------------------------|-----------------------------------------------------------------------------------------------------------------------------------|-----------------------------------------|
| pUC19                          | Cloning vector backbone with multiple cloning site, Amp <sup>R</sup>                                                              | Norrandar <i>et al.</i> , <sup>12</sup> |
| pUC4k                          | Cloning vector backbone with multiple cloning site, Km <sup>R</sup> , Amp <sup>R</sup>                                            | Taylor and Rose, <sup>13</sup>          |
| pUC19- $\Delta sII0485$        | Construction of the $\Delta kaiA3$ strain via homologous recombination                                                            | This study                              |
| pUC19- $\Delta sII0485$ -compl | Construction of the $\Delta kaiA3/kaiA3$ complementation strain via homologous recombination                                      | This study                              |
| pUC19- $\Delta kaiA3B3$        | Construction of the $\Delta kaiA3B3C3$ strain via homologous recombination                                                        | This study                              |
| pUR-N-Flag-xyz                 | pVZ321-based conjugative expression vector, expression of N-terminal FLAG-tagged genes from the copper repressible PpetJ promotor | Savakis <i>et al.</i> , <sup>14</sup>   |
| pUR-NFLAG- <i>sII0485</i>      | Expression of N-terminal FLAG-tagged <i>kaiA3</i> .                                                                               | This study                              |

178



179 **Dataset S1 (separate Excel file).** Putative orthologs of KaiA3 in cyanobacteria and prokaryotes.  
180 Header names are described in the following and the exact name is mentioned in parenthesis.  
181 Information is provided about the organism (name), the corresponding genus (genus), the  
182 taxonomy (taxonomy), and the taxonomic identifier (taxid). Furthermore, the annotated protein  
183 name on NCBI (protein), the protein identifier on NCBI (protein\_id), the genome identifier where  
184 the protein originated from (genome\_id), the date when it was last modified on NCBI (date), BLAST  
185 statistics (e\_value, bitscore, identity), the length of the protein (length) as well as the sequence  
186 (seq) were recorded. In addition, the protein id of backward best hit from *Synechocystis*  
187 (*synechocystis\_prot\_id*) as well as the genome identifier for the genome assembly  
188 (*synechocystis\_id*) was stored.

189 **Dataset S2 (separate Excel file).** Dataset from immunoprecipitation-coupled LC-MS/MS analyses  
190 of KaiC3 and KaiC1 interactome analyses. Identified and quantified proteins from label-free  
191 analysis of  $\alpha$ -FLAG-KaiC3 or -KaiC1 and control co-immunoprecipitation are listed.

192 **Dataset S3 (separate Excel file).** Dataset of KaiA3B3C3 *in vitro* co-incubation assays on KaiC3  
193 phosphorylation. Localized KaiC3 phosphorylation sites and phosphorylation occupancies of  
194 Ser423/Thr424 are listed.

195

## 196 **References**

197

- 198 1. Waterhouse AM, Procter JB, Martin DMA, Clamp M, Barton GJ. Jalview Version  
199 2-A multiple sequence alignment editor and analysis workbench. *Bioinformatics*  
200 **25**, 1189-1191 (2009).  
201
- 202 2. Katoh K, Standley DM. MAFFT multiple sequence alignment software version 7:  
203 Improvements in performance and usability. *Molecular Biology and Evolution* **30**,  
204 772-780 (2013).  
205
- 206 3. Madeira F, *et al.* The EMBL-EBI search and sequence analysis tools APIs in 2019.  
207 *Nucleic Acids Research* **47**, W636-W641 (2019).  
208
- 209 4. Ye S, Vakonakis I, Ioerger TR, LiWang AC, Sacchettini JC. Crystal structure of  
210 circadian clock protein KaiA from *Synechococcus elongatus*. *Journal of Biological*  
211 *Chemistry* **279**, 20511-20518 (2004).  
212
- 213 5. Zimmermann L, *et al.* A Completely Reimplemented MPI Bioinformatics Toolkit  
214 with a New HHpred Server at its Core. *Journal of Molecular Biology* **430**, 227-  
215 2243 (2018).  
216
- 217 6. Rausenberger J, *et al.* Photoconversion and Nuclear Trafficking Cycles Determine  
218 Phytochrome A's Response Profile to Far-Red Light. *Cell* **146**, 813-825 (2011).  
219
- 220 7. Hiltbrunner A, *et al.* Nuclear Accumulation of the Phytochrome A Photoreceptor  
221 Requires FHY1. *Current Biology* **15**, 2125-2130 (2005).  
222
- 223 8. Shimizu-Sato S, Huq E, Tepperman JM, Quail PH. A light-switchable gene  
224 promoter system. *Nature Biotechnology* **20**, 1041-1044 (2002).  
225

- 226 9. Wiegard A, *et al.* *Synechocystis* KaiC3 displays temperature- And KaiB-dependent  
227 ATPase activity and is important for growth in darkness. *J Bacteriol* **202**, 1-36  
228 (2020).  
229
- 230 10. Köbler C, Schultz SJ, Kopp D, Voigt K, Wilde A. The role of the *Synechocystis* sp.  
231 PCC 6803 homolog of the circadian clock output regulator RpaA in day–night  
232 transitions. *Molecular Microbiology* **110**, 847-861 (2018).  
233
- 234 11. Nishiwaki T, *et al.* Role of KaiC phosphorylation in the circadian clock system of  
235 *Synechococcus elongatus* PCC 7942. *Proc Natl Acad Sci U S A* **101**, 13927-13932  
236 (2004).  
237
- 238 12. Norrander J, Kempe T, Messing J. Construction of improved M13 vectors using  
239 oligodeoxynucleotide-directed mutagenesis. *Gene* **26**, 101-106 (1983).  
240
- 241 13. Taylor LA, Rose RE. A correction in the nucleotide sequence of the Tn903  
242 kanamycin resistance determinant in pUC4K. *Nucleic Acids Research* **16**, 358  
243 (1988).  
244
- 245 14. Savakis P, *et al.* Light-induced alteration of c-di-GMP level controls motility of  
246 *Synechocystis* sp. PCC 6803. *Molecular Microbiology* **85**, 239-251 (2012).  
247  
248
